## **Title page**

### *Full title*

Excitatory GABAergic signalling is associated with acquired benzodiazepine resistance in status epilepticus

### *Running Title*

GABAergic signalling in status epilepticus

### *Keywords*

status epilepticus, chloride, GABAA receptors, inhibition, seizures

### *Authors*

Richard J. Burman<sup>1,2,3</sup>, Alexandru Calin<sup>3</sup>, Neela K. Codadu<sup>4</sup>, Rebecca Wright<sup>3</sup>, Sarah E. Newey<sup>3</sup>, Maurits van den Burg<sup>1</sup>, John Hamin Lee<sup>1</sup>, R. Ryley Parrish<sup>4</sup>, Joanne M. Wilmshurst<sup>2</sup>, Colin J. Akerman<sup>3</sup>, Andrew J. Trevelyan<sup>4</sup>, Joseph V. Raimondo<sup>1</sup>

<sup>1</sup>Division of Cell Biology, Department of Human Biology, Neuroscience Institute and Institute of Infectious Disease and Molecular Medicine, Faculty of Health Sciences, University of Cape Town, Cape Town, South Africa

<sup>2</sup>Department of Paediatric Neurology, Red Cross War Memorial Children's Hospital, Cape Town South Africa

<sup>3</sup>Department of Pharmacology, University of Oxford, Oxford, United Kingdom

<sup>4</sup>Institute of Neuroscience, Newcastle University, United Kingdom

### *Corresponding author:*

Joseph V. Raimondo

Department of Human Biology

University of Cape Town

Cape Town, Anzio Rd, 7925

email: [joseph.raimondo@uct.ac.za](mailto:joseph.raimondo@uct.ac.za)

### *Author contributions*

RJB designed and performed experiments, collected clinical data, performed data analysis and wrote the manuscript. AC performed chloride imaging experiments. NKC, MvdB, JHL, RP and AJT setup and collected data for the extracellular recording experiments. RW and SN performed molecular biology experiments. HM provided supervision to the project. JMW assisted in collection of clinical data. CJA provided supervision for the project and assisted in the writing of the manuscript. AJT performed data analysis, provided supervision for the project and assisted in the writing of the manuscript. JVR designed experiments, performed data analysis, wrote the manuscript and provided overall supervision.

### *Display items*

8 figures; 1 supplementary figure; 1 supplementary table

## Abstract

Status epilepticus (SE) is defined as a state of unrelenting seizure activity. It is associated with a rapidly rising mortality rate, and thus constitutes a medical emergency. Benzodiazepines, which act as positive modulators of chloride ( $\text{Cl}^-$ ) permeable  $\text{GABA}_A$  receptors, are indicated as the first line of treatment, but this is ineffective in many cases. We found that 48% of children presenting with SE were unresponsive to benzodiazepine treatment, and critically, that the duration of SE at the time of treatment is an important predictor of non-responsiveness. We therefore investigated the cellular mechanisms that underlie acquired benzodiazepine resistance, using rodent organotypic brain slices. Removing  $\text{Mg}^{2+}$  ions leads to an evolving pattern of epileptiform activity, and eventually to a persistent state of repetitive discharges that strongly resembles clinical EEG recordings of SE. We show that the persistent SE-like activity is associated with a reduction in  $\text{GABA}_A$  receptor conductance and  $\text{Cl}^-$  extrusion capability. We explored the effect on intraneuronal  $\text{Cl}^-$  using both gramicidin, perforated-patch clamp recordings and  $\text{Cl}^-$  imaging. This showed that during SE-like activity, reduced  $\text{Cl}^-$  extrusion capacity was further exacerbated by activity-dependent  $\text{Cl}^-$  loading, resulting in a persistently high intraneuronal  $\text{Cl}^-$ . Consistent with these results, we found that optogenetic stimulation of GABAergic interneurons in the SE-like state, actually enhanced epileptiform activity in a  $\text{GABA}_A\text{R}$  dependent manner. Together our findings describe a novel potential mechanism underlying benzodiazepine-resistant SE, with relevance to how this life-threatening condition should be managed in the clinic.

## Introduction

The great majority of all spontaneously occurring seizures terminate within a few seconds to minutes, and without medical intervention. When seizures fail to stop naturally, this is referred to as status epilepticus (SE). This represents a neurological emergency and requires immediate therapeutic intervention. SE occurs more frequently in children, and if not managed effectively, is associated with significant morbidity and even mortality (Boggs, 2004). Current first-line treatment for SE recommends the use of benzodiazepines (Glauser *et al.*, 2016). These drugs work by positively modulating Cl<sup>-</sup>-permeable ionotropic GABA<sub>A</sub> receptors (GABA<sub>A</sub>R), which underlie the majority of fast inhibitory neurotransmission within the brain. The intent is to boost inhibitory signalling in an attempt to terminate SE. Unfortunately, benzodiazepine treatment fails to terminate seizures in a large fraction of patients, which underscores the inadequacy of our current first-line therapeutic strategy for treating this condition (Appleton *et al.*, 2000; Mayer *et al.*, 2002; Chin *et al.*, 2008).

Current thinking in the field is that benzodiazepine resistance in SE is largely due to impaired GABA<sub>A</sub>R trafficking (Goodkin and Kapur, 2009). Both *in vitro* and *in vivo* animal models have shown that extended seizure activity is correlated with internalisation of GABA<sub>A</sub>Rs in the hippocampus (Kapur and Coulter, 1995; Goodkin *et al.*, 2005; Naylor *et al.*, 2005). In addition, SE has been shown to be associated with a reduction in surface expression of GABA<sub>A</sub>R subunits (γ2), which are necessary for benzodiazepine binding (Goodkin *et al.*, 2008). This line of reasoning suggests that SE-induced changes to the GABA<sub>A</sub>R impairs the ability of benzodiazepines to enhance the GABA<sub>A</sub>R conductance, thereby resulting in treatment failure.

It is well accepted that the intracellular concentration of  $\text{Cl}^-$ , and therefore the reversal potential for  $\text{GABA}_A$ Rs ( $E_{\text{GABA}}$ ) can change over multiple time scales (Wright *et al.*, 2011; Ellender *et al.*, 2014; Sato *et al.*, 2017). Long-term changes in the expression of  $\text{Cl}^-$  transporter proteins modifies steady-state  $E_{\text{GABA}}$  over development and in multiple disease states including epilepsy (Moore *et al.*, 2017). In addition to these well-described long-term changes, short-term (seconds to minutes) changes in  $E_{\text{GABA}}$  can occur following intense  $\text{GABA}_A$  activation that causes  $\text{Cl}^-$  influx, which can overwhelm  $\text{Cl}^-$  extrusion mechanisms (Kaila *et al.*, 1989; Staley *et al.*, 1995; Wright *et al.*, 2011). Furthermore, significant  $\text{Cl}^-$  accumulation and a temporary excitatory shift in  $\text{GABA}_A$ ergic signalling has been shown to accompany single seizure-like events in both *in vitro* (Lamsa and Kaila, 1997; Isomura *et al.*, 2003; Fujiwara-Tsukamoto *et al.*, 2010; Ilie *et al.*, 2012; Ellender *et al.*, 2014) and *in vivo* (Sato *et al.*, 2017) models. The breakdown of the  $\text{Cl}^-$  gradient serves to explain the surprising excitatory effects of  $\text{GABA}_A$ ergic interneuronal subtypes recently observed during *in vitro* and *in vivo* seizure events (Ellender *et al.*, 2014; Khoshkhoo *et al.*, 2017; Magloire *et al.*, 2018). This suggests that in circuits where seizures have caused sufficient  $\text{Cl}^-$  loading,  $\text{GABA}_A$ R mediated synaptic signalling can serve to exacerbate rather than control hyperexcitability, which has direct relevance for the inhibitory efficacy of benzodiazepines. Deeb *et al.* (2013) have previously demonstrated that the benzodiazepine diazepam has reduced inhibitory capability under these conditions of activity-driven  $\text{Cl}^-$  accumulation. However, it is currently unknown as to whether  $\text{Cl}^-$  dynamics and seizure-associated shifts in  $\text{GABA}_A$ ergic signalling are involved in the development of benzodiazepine resistance in SE.

In this study we combine clinical and experimental data to explore the phenomenon of benzodiazepine-resistant SE. First we document the incidence of benzodiazepine resistance in a South African cohort of paediatric patients in SE and provide the first clinical evidence that seizure

duration prior to treatment is a valuable predictor of benzodiazepine resistance. As SE is most often caused by acute brain insults resulting in sustained seizure-activity, we used the acute *in vitro* 0 Mg<sup>2+</sup> model of SE (Dreier *et al.*, 1998) to explore the cellular mechanisms underlying acquired benzodiazepine resistance. We demonstrate that the benzodiazepine diazepam loses its anticonvulsant efficacy and can actually enhance epileptiform discharges during SE-like activity. Utilising gramicidin perforated patch-clamp recordings, Cl<sup>-</sup> imaging and optogenetic control of GABAergic interneurons, we characterise changes in intracellular Cl<sup>-</sup> and GABAergic signalling during the development of SE. We find that although GABA mediated conductances are reduced in early SE, diazepam resistance is associated with deficits in Cl<sup>-</sup> extrusion capability and profound activity-dependent Cl<sup>-</sup> accumulation which results in excitatory interneuronal signalling via GABA<sub>A</sub>Rs.

## Materials and methods

### *Clinical data*

Clinical data was obtained from paediatric patients presenting with convulsive status epilepticus (CSE) to the Red Cross War Memorial Children's Hospital (RCWMCH) from 2015 to 2018 as part of a clinical trial. This study was approved by the University of Cape Town Human Ethics Committee (HREC 297/2005) and the protocol was registered on the ClinicalTrials.gov registry (NCT03650270). CSE was defined as any seizure that lasts longer than five minutes, or multiple discrete seizures between which there is no extended period of recovery between events (Trinka *et al.*, 2015). Upon admission, all patients were treated with benzodiazepines. If CSE continued after two doses of benzodiazepines, patients were then given second-line therapy. Study data was collected using REDCap (UCT eResearch Centre).

### *Organotypic hippocampal brain slice preparation*

Slices were prepared from GAD2-cre-tdTomato mice (C57BL/6 background, JAX lab) or wistar rats. The GAD2-cre-tdTomato strain which resulted in cre-recombinase and tdTomato expression in all GABAergic interneurons (Taniguchi *et al.*, 2011). The use of animals was approved by either the University of Cape Town (mouse) or the University of Oxford (rat) animal ethics committees. Organotypic brain slices were prepared using 7 day old animals and followed the protocol originally described by (Stoppini *et al.*, 1991) (for details see Raimondo *et al.* (2016)). For experiments using optogenetics, after 1 day in culture, slices prepared from GAD2-cre-tdTomato mice were transduced with adeno-associated vector serotype 1 (AAV1) containing a floxed-STOP channelrhodopsin (ChR2) linked to a yellow fluorescent protein (YFP), which resulted in selective expression of ChR2 in GABAergic interneurons (Royo *et al.*, 2008). For Cl<sup>-</sup> imaging experiments, neurons were biolistically transduced with ChlophensorN construct following the same procedure described by Raimondo *et al.* (2013). Recordings were performed 2–7 days post-transfection.

### *Electrophysiology*

Brain slices were transferred to a submerged recording chamber (whole-cell and perforated patch experiments) or an interface recording chamber (LFP experiments) where they were continuously superfused with standard artificial CSF (aCSF) bubbled with carbogen gas (95% O<sub>2</sub>: 5% CO<sub>2</sub>) using peristaltic pumps (Watson-Marlow). The standard aCSF was composed of (in mM): NaCl (120); KCl (3); MgCl<sub>2</sub> (2); CaCl<sub>2</sub> (2); NaH<sub>2</sub>PO<sub>4</sub> (1.2); NaHCO<sub>3</sub> (23); D-Glucose (11) with pH adjusted to be between 7.35-7.40 using 0.1 mM NaOH. For patch-clamp experiments, neurons were visualized using a BX51WI upright microscope (Olympus) using 20x or 40x water-immersion objectives, and targeted for recording. For whole-cell recordings, micropipettes were

prepared from borosilicate glass capillaries (Warner Instruments) and filled a low Cl<sup>-</sup> internal solution composed of (in mM): Kgluconate (120); KCl (10); Na<sub>2</sub>ATP (4); NaGTP (0.3); Na<sub>2</sub>-phosphocreatinine (10) and HEPES (10). When recording GABAergic synaptic currents, pipettes were filled with a high Cl<sup>-</sup> internal solution (Cl<sup>-</sup> 141mM) composed of (in mM): KCl (135), NaCl (8.9) and HEPES (10). Gramicidin perforated recordings (Kyrozis and Reichling, 1995) were performed using glass pipettes containing the high Cl<sup>-</sup> internal solution. Adequate perforation of the membrane was assessed by monitoring access resistance and was defined when access resistance was <90 MΩ. Patch-clamp recordings were made with Axopatch 200B amplifiers (Molecular Devices) and data acquired using WinWCP (University of Strathclyde). LFP recordings were performed using an AC-coupled amplifier (AM Systems). Data was acquired using the LabChart Pro (AD Instruments) with recordings processed using a 140Hz low-pass filter. SLEs were defined as events where significant deviations from the resting potential in LFP and patch-clamp recordings (>2 standard deviations) lasting at least 5 seconds. The LRD phase was defined as recurrent epileptiform discharges that persisted for at least 5 minutes. Slices that developed spontaneous SLEs prior to 0 Mg<sup>2+</sup> exposure were excluded from analysis in order to ensure that prior epileptiform activity would not have altered the neuronal network (Kamphuis *et al.*, 1991; Morimoto *et al.*, 2004). The following drugs were used: diazepam; flumazenil; CGP-35348; kynurenic acid; tetrodotoxin or QX-314 (all from Tocris Bioscience).

### *Confocal imaging*

A confocal microscope (Zeiss) was used to visualise tdTomato and YFP-labelled ChR2 expression using 561 nm and 488 nm lasers. ClopHensorN (modified from the original ClopHensor by Arosio *et al.* (2010)) expressing neurons were excited using 458, 488 and 561 nm lasers and emission collected by photomultiplier tubes (PMTs): between 500 - 550 nm for EGFP and 635 - 700 nm for



the tdTomato. Calibration of the reporter and Cl<sup>-</sup> measurements were made as previously described Raimondo *et al.* (2013).

### *Cell surface biotinylation and western blotting*

Organotypic hippocampal slices were incubated for 3 hours at 28°C–30°C, in either control aCSF or aCSF with 0 Mg<sup>2+</sup>, while continuously bubbling with 95% O<sub>2</sub>-5% CO<sub>2</sub>. Biotinylation was performed to produce “total” and “surface” protein lysate samples as described in (Wright *et al.*, 2017). Blots were incubated with rabbit anti-C-terminus KCC2 (1:500, Merck Millipore) followed by horseradish peroxidase (HRP)-conjugated goat anti-rabbit antibody (1:2000, Thermo Scientific). For each sample, the surface protein was normalized against the total protein, which was run in the adjacent lane. As the ratio of surface/total was calculated within each sample, this controlled for differences in overall protein levels across samples and variance associated with loading.

### *Data analysis*

Clinical data was analysed using SPSS Statistics (IBM) while experimental data analysis was performed using Matlab (MathWorks). Statistical measurements were performed using GraphPad Prism. Data reported as mean ± SEM unless otherwise stated.

### *Data availability statement*

Upon publication, all data presented in this manuscript will be made available on an open-access data repository.

## Results

### *Benzodiazepine-resistance in status epilepticus is associated with enhanced morbidity and can be predicted by seizure duration prior to treatment*

A total of 144 admissions of paediatric CSE were observed at RCWMCH between 2015-2018 (median age 28.11 months, interquartile range 50.62 months). 52% of patients responded to first-line benzodiazepine treatment, typically lorazepam, diazepam or midazolam (termed ‘benzodiazepine-sensitive’ or ‘bzs’), while 48% did not (termed ‘benzodiazepine-resistant’ or ‘bzr’) (**Fig. 1A**). Benzodiazepine resistance was associated with enhanced morbidity as bzr patients required longer care in hospital (median 4.00 days interquartile range 8.50 vs 1.0 days interquartile range 1,  $p < 0.0001$ , *Mann-Whitney U test*, **Fig. 1B**) and were more likely to need admission to the paediatric intensive care unit (PICU) ( $OR = 47.57$ , 95% *CI*: 6.24 – 362.9,  $p < 0.0001$ , *Fisher-exact test*, **Fig. 1C**). Whilst acute causes were the most common precipitant of SE, we found no difference in the underlying aetiology between the groups ( $p = 0.25$ , *Chi-Squared test*, **Fig. 1D**).

The median duration of SE prior to the time of initial treatment was 50.0min (interquartile range 36.5min), but notably, longer SE durations were increasingly associated with benzodiazepine resistance (bzr SE duration =  $40.0 \pm 24.0$ min (median  $\pm$  interquartile range); bzr SE duration =  $65.00 \pm 50.00$ min;  $p < 0.0001$ , *Mann-Whitney U test*, **Fig. 1E**). These data suggested that the duration of SE at the time of admission could be a useful clinical classifier, especially since benzodiazepine resistance is associated with enhanced morbidity. We addressed this question using receiver operating characteristic (ROC) curve analysis (**Fig. 1F**), by assessing the relative proportions of true positive rates (short duration SE are bzr; long duration SE are bzr) to false positive rates, as the classifier time changes from short (top right) to long (bottom left) durations.

The area under curve (AUC) of 0.75 indicates that SE duration does indeed discriminate between these two patient populations, and importantly, it further indicates that the optimum discrimination threshold occurs at almost exactly 1 hour (maximal deviation from the diagonal was at 61 min; **Fig. 1E,F**). A contingency table (“confusion matrix”) using 1 hour as the cut off (see **Supplementary Table 1**), shows that prior to this time, 67% of patients responded to benzodiazepine, but after that, only 18% did.

These clinical data suggest strongly that a critical factor is the continued seizure activity itself, and that the benzodiazepine resistance is an acquired, activity-dependent phenotype. There are striking parallels of pharmacoresistance, acquired over a similar time course, in acute rodent *in vitro* models, and so we used such a model to explore the underlying cellular mechanism.

*Early application of diazepam is anticonvulsant whilst late application enhances epileptiform activity in an in vitro model of status epilepticus*

Our clinical data demonstrated a diverse set of causes for SE, and no particular set of causes of SE which enhanced the likelihood of benzodiazepine resistance. As acute brain insults (the most common cause in our clinical cohort) causing extended seizures lasting minutes to hours can result in benzodiazepine resistance, we used the well characterised *in vitro* 0 Mg<sup>2+</sup> model of acute seizures and SE (Anderson *et al.*, 1986; Mody *et al.*, 1987; Gutiérrez and Heinemann, 1999; Albus *et al.*, 2008). Here Mg<sup>2+</sup> removal from the artificial cerebrospinal fluid (aCSF), results in initial interictal-like activity followed by the gradual development of seizure-like events, which mimic what is observed in temporal lobe seizures in humans (Anderson *et al.*, 1986; Dreier *et al.*, 1998). Importantly, after extended periods of Mg<sup>2+</sup> withdrawal, distinct ictal events no longer occur and are replaced by persistent seizure-like activity in the form of recurrent epileptiform discharges

(Anderson *et al.*, 1986; Dreier *et al.*, 1998), which strongly resemble clinical EEG recordings of SE (**Fig. 2A,B**). This late-stage activity is also referred to as the late recurrent discharge phase (LRD) and represents the best available *in vitro* model of SE (Zhang *et al.*, 1995; Dreier *et al.*, 1998). We therefore sought to determine the effect of diazepam on the evolution of *in vitro* seizure-like activity using mouse organotypic hippocampal brain slices maintained on interface in the 0 Mg<sup>2+</sup> model of SE.

First we showed that diazepam (3μM) increases the decay time constant (tau) of voltage-clamp recorded GABA<sub>A</sub>R synaptic currents (GSCs) elicited via optogenetic activation of GABAergic interneurons (pre-diazepam 43 ± 4ms vs post-diazepam 57 ± 6ms,  $p = 0.004$ , *paired t-test*, **Supplementary Fig. 1**; recordings performed in the presence of 10μM CGP55845, to block GABA<sub>B</sub>Rs). This could be reversed by application of its competitive antagonist, flumazenil (0.4μM) (57 ± 6ms vs 40ms ± 4ms,  $p = 0.005$ , *paired t-test*). These findings confirm that GABAergic signalling in the organotypic slices are sensitive to diazepam during baseline activity.

We then monitored the evolution of 0 Mg<sup>2+</sup> induced seizure activity using local field potential recordings with slices on interface, whilst diazepam (3μM) was either applied ‘early’, i.e. together with the proconvulsant 0 Mg<sup>2+</sup> solution, or ‘late’ once epileptiform activity had already entered the SE-like late recurrent discharge (LRD) phase. Early application of diazepam significantly delayed onset of SLEs compared to the control and late groups, which were not exposed to diazepam prior to onset of SLEs (early: 799.73s ± 89.81s,  $n = 13$  vs control: 522.15 ± 45.93s,  $n = 10$  and late: 548.8 ± 34.46s,  $n = 9$ ,  $p = 0.003$  and  $p = 0.008$ , *Mann-Whitney test*, **Fig. 2C-F**). Early application of diazepam also caused a significant decline in SLE frequency (**Fig. 2G**) before entry

into the LRD as compared to control ( $5.00 \pm 3.06$  vs  $10.85 \pm 1.66$ ,  $p = 0.01$ , *unpaired t-test*) and late groups ( $5.00 \pm 3.06$  vs  $11.33 \pm 1.78$ ,  $p = 0.005$ , *unpaired t-test*). Moreover, early application of diazepam significantly delayed onset of LRD (**Fig. 2H**) compared to the control ( $2623 \pm 513.9$ s vs  $1429 \pm 187.1$ s,  $p = 0.03$ , *Mann-Whitney test*) and late groups ( $2623 \pm 513.9$ s vs  $1274 \pm 169.2$ s,  $p = 0.0004$ , *Mann-Whitney test*). This demonstrated that diazepam had a significant anticonvulsant effect on the initial pathological discharges in  $0 \text{ Mg}^{2+}$ .

In contrast, we found that diazepam lost its anticonvulsant effect once epileptiform activity had become persistent (SE-like activity) and increased some markers of epileptiform activity. To quantify this effect we analysed the properties of burst discharges within a predefined 60s window 7 mins after the onset of the LRD phase. We found a significant increase in discharge duration (**Fig. 2I-L**) between both control and early diazepam groups ( $2.42 \pm 0.41$ s vs  $4.44 \pm 0.68$ s,  $p = 0.02$ , *Mann-Whitney test*) and between control and late diazepam groups ( $2.42 \pm 0.41$ s vs  $4.72 \pm 2.62$ s,  $p = 0.02$ , *Mann-Whitney test*). This was not accompanied by a change in inter-burst interval (control:  $5.20 \pm 0.72$ s, early:  $6.00 \pm 1.05$ s, late:  $6.57 \pm 0.88$ s,  $p = 0.35$ , *Kruskal-Wallis test*, **Fig. 2M**). Furthermore, there was a significant increase in the power spectral density (**Fig. 2I-K,N**) in the 1 - 40Hz bandwidth in the control vs early ( $284.4 \pm 45.12 \text{ uV}^2/\text{Hz}$  vs  $583.90 \pm 75.36 \text{ uV}^2/\text{Hz}$ ,  $p = 0.004$ , *unpaired t-test*) and control vs late groups ( $284.4 \pm 45.12 \text{ uV}^2/\text{Hz}$  vs  $466.50 \pm 42.31 \text{ uV}^2/\text{Hz}$ ,  $p = 0.008$ , *unpaired t-test*).

*Persistent epileptiform activity is associated with a reduction in GABAergic synaptic conductances*

Having observed that diazepam lost its anticonvulsant efficacy and enhanced burst discharges during LRD, we next sought to determine whether synaptic GABA<sub>A</sub>R internalisation (Goodkin et al., 2005) and hence a reduction in GABA synaptic conductance ( $g_{GABA}$ ) could underlie this effect. We optogenetically activated GABAergic neurons, and recorded postsynaptic GABA-R mediated currents, in voltage-clamp mode, in CA1 pyramidal neurons in mouse organotypic slice cultures. (**Fig. 3A**). By recording GABA currents at different holding voltages  $g_{GABA}$  could be measured before and after 30 mins exposure to 0 Mg<sup>2+</sup> in the same neuron. GABA<sub>B</sub> receptor blockade to isolate GABA<sub>A</sub>Rs was not utilised as this could interfere with the seizure-like activity evoked by 0 Mg<sup>2+</sup> (Swartzwelder *et al.*, 1987; Codadu *et al.*, 2018). Following termination of SE-like activity using reintroduction of Mg<sup>2+</sup>,  $g_{GABA}$  was remeasured. The mean  $g_{GABA}$  elicited under baseline conditions decreased from  $23.63 \pm 4.10$  nS to  $13.07 \pm 3.17$  nS, after SE-like activity had been arrested ( $n = 14$ ,  $p = 0.0001$ , *paired t-test*, **Fig. 3B-D**), with no significant change in access resistance ( $15.68 \pm 1.03M\Omega$  vs  $18.60 \pm 1.18M\Omega$ ,  $p = 0.11$ , *paired t-test*). These findings demonstrate that SE-like activity is associated with reductions in GABA synaptic conductances which is most likely caused by GABA<sub>A</sub>R internalisation (Goodkin et al., 2005). Nonetheless, despite prolonged periods of persistent seizure-like activity *in vitro*, optogenetic activation of GABAergic interneurons could still reliably evoke GABA synaptic currents.

#### *Status epilepticus-like activity is accompanied by compromised neuronal Cl<sup>-</sup> extrusion*

We surmised that additional mechanisms to GABA<sub>A</sub>R internalisation must also play a role in the loss of diazepam's anticonvulsant efficacy during LRD. This is because GABA<sub>A</sub>R internalisation cannot explain how diazepam could positively modulate epileptiform discharges during SE-like activity. Intracellular Cl<sup>-</sup> accumulation and a depolarizing shift in  $E_{GABA}$ , could potentially explain this phenomenon. To explore whether SE-like activity might compromise Cl<sup>-</sup> extrusion

mechanisms in neurons we performed gramicidin perforated patch-clamp recordings from hippocampal pyramidal cells. This technique avoids disrupting the  $[Cl^-]_i$  of the neuron. Somatic application of GABA agonists (GABA, or muscimol) was used to record  $E_{GABA}$  under quiescent network conditions in order to assess steady state changes in  $Cl^-$  extrusion (**Fig. 4A**).  $E_{GABA}$  was measured using voltage step protocols, before  $Mg^{2+}$  removal (baseline) and after different periods of induced SE-like activity had been arrested by reintroducing  $Mg^{2+}$ . We found that in the hippocampal organotypic brain slices, resting  $E_{GABA}$  shifted from  $-83.43$  to  $-72.29$ mV after a period of 30 min of  $Mg^{2+}$  withdrawal ( $n = 8, p = 0.0001$ , *unpaired t-test*, **Fig. 4B-D**). We further investigated this effect in rat hippocampal organotypic slices, extending the period of 0  $Mg^{2+}$  withdrawal and putative SE-like activity to 3 hours. This also resulted in increases in  $E_{GABA}$  from  $-80.84 \pm 2.78$  mV to  $-68.63 \pm 3.52$  mV,  $n = 7, p = 0.04$ , *Mann-Whitney test* (**Fig. 4E**).

We next used surface biotinylation and western blotting for the major cation-chloride cotransporter (KCC2) to determine whether the depolarizing shift in  $E_{GABA}$  was accompanied by a shift in the cell surface expression of KCC2. Indeed, on average, the total amount of surface KCC2 in organotypic hippocampal slices treated with 0  $Mg^{2+}$  was reduced to  $76.4 \pm 0.05\%$  of that found in control slices ( $n = 9, p = 0.003$ , *unpaired t-test*, **Fig. 4F,G**). When KCC2 was further subdivided into monomeric and dimeric forms it was found that this drop in surface protein was almost exclusively due to a reduction in the KCC2 dimer. Zero  $Mg^{2+}$  treatment reduced the levels of surface bound KCC2 dimer to  $60.6 \pm 8.8\%$  of controls ( $p = 0.002$ , *unpaired t-test*,  $n = 9$ ). In contrast, monomeric KCC2 showed little difference across the two conditions with the mean in the 0  $Mg^{2+}$  condition at  $97.0 \pm 6.7\%$  that of control ( $p = 0.66$ , *unpaired t-test*). These findings confirm previous reports (Rivera *et al.*, 2004) that prolonged seizure activity results in a reduction in expression of KCC2 and a depolarizing shift in steady-state  $E_{GABA}$ .

### *Persistent epileptiform activity drives pronounced depolarizing shifts in $E_{GABA}$ and intracellular $Cl^-$ accumulation*

The shifts in steady-state  $E_{GABA}$  we observed above are unlikely to explain the enhancing effect of diazepam on burst discharges we observed during SE-like activity. This is because resting  $E_{GABA}$ 's of  $\sim -60$  mV are typically below the action potential (AP) threshold from of CA1 neurons in our preparation (AP threshold:  $-38.72 \pm 5.45$  mV,  $n = 17$ ) and thus would still render GABA<sub>A</sub>R mediated transmission inhibitory. We therefore surmised that compromised  $Cl^-$  extrusion combined with the activity-dependent  $Cl^-$  loading during SE-like activity could result in more severe shifts in  $E_{GABA}$ .

To explore this possibility, we modified our gramicidin perforated patch-clamp recording protocols in order to track dynamic changes in  $E_{GABA}$  during the evolution of epileptiform activity in the  $0 \text{ Mg}^{2+}$  model (**Fig. 5A**). The recording configuration was rapidly switched between current-clamp mode in order to measure membrane potential and short periods in voltage-clamp mode, during which a voltage ramp protocol and somatic GABA puff was applied, to provide a rapid estimate of  $E_{GABA}$  (**Fig. 5B**). Compared to baseline, SLEs were associated with pronounced increases in  $E_{GABA}$ .  $E_{GABA}$  shifted from mean baseline levels of  $-83.88 \pm 1.13$  mV to  $-42.71 \pm 1.04$  mV during SLEs ( $n = 7$ ,  $p < 0.0001$ , *paired t-test*) before partially recovering to a mean level of  $-78.92 \pm 1.13$  mV between events (**Fig. 5C,D**). SE-like activity (LRD phase) profoundly elevated  $E_{GABA}$  again to  $-43.21 \pm 1.94$  mV ( $p < 0.0001$  as compared to baseline, *paired t-test*).  $E_{GABA}$  levels were equally high during SLEs and the LRD phase ( $-42.71 \pm 1.04$  mV vs  $-43.21 \pm 1.94$  mV,  $p = 0.73$ , *paired t-test*). Once persistent epileptiform activity was terminated either by reintroduction of  $\text{Mg}^{2+}$  or  $50 \mu\text{M}$  tetrodotoxin (TTX),  $E_{GABA}$  decreased to  $-71.03 \pm 1.45$  mV. However, we did



not observe  $E_{GABA}$  to return to baseline levels, it remained moderately but persistent depolarised (baseline:  $-83.88 \pm 1.13\text{mV}$  vs recovery:  $-71.03 \pm 1.45\text{mV}$ ,  $p = 0.001$ , *paired t-test*), further confirming the long-term shifts in  $\text{Cl}^-$  extrusion mechanisms described above. These experiments demonstrated  $E_{GABA}$  to be highly dynamic. SE-like activity was associated with profound elevations in  $E_{GABA}$  to values comparable to the AP threshold for these neurons, which would render  $\text{GABA}_{\text{A}}$ R mediated transmission excitatory.

To directly measure changes in  $\text{Cl}^-$  concentration, which could underlie the observed activity driven shifts in  $E_{GABA}$ , we employed the genetically encoded reporter of  $\text{Cl}^-$ , ClophensorN. This reporter enables pH corrected estimates of intracellular  $\text{Cl}^-$  concentration (Arosio *et al.*, 2010; Raimondo *et al.*, 2013; Sato *et al.*, 2017). Biolistic transfection of mouse organotypic hippocampal brain slices resulted in sparse ClopHensorN expression within pyramidal neurons. Confocal imaging of ClopHensorN expressing cells was performed concurrently with whole cell patch-clamp recordings of neighbouring cells to provide a simultaneous readout of seizure-like activity (**Fig. 5E**). SLEs were associated with increases in  $[\text{Cl}^-]_i$  (**Fig. 5G**). Importantly, the LRD phase was associated with a significant increase in  $[\text{Cl}^-]_i$  of  $15.53 \pm 7.39 \text{ mM}$  ( $n = 6$ ,  $p = 0.03$ , *Wilcoxon test*). These results suggest that *in vitro* SE-like activity is accompanied by profound short-term, activity-driven increases in  $E_{GABA}$  and  $[\text{Cl}^-]_i$ .

### *GABA-releasing interneurons are active and highly correlated with pyramidal cell activity during the late recurrent discharge phase*

Having observed significant increases in  $E_{GABA}$  and intracellular  $\text{Cl}^-$  in pyramidal neurons during the LRD phase of the  $0 \text{ Mg}^{2+}$  model of SE, we next aimed to determine how the activity of GABA-releasing interneurons might relate to that of pyramidal cells during the recurrent discharges

observed in this period. To do so we used organotypic slices prepared from mice where the cre-lox system was used to selectively express the red fluorescent reporter tdTomato under the glutamic acid decarboxylase type 2 (GAD2) promoter. Using dual whole-cell patch-clamp, we made targeted recordings from CA1 hippocampal GABAergic interneurons and pyramidal cells ( $n = 12$ ) during various phases of seizure-like activity in the  $0 \text{ Mg}^{2+}$  *in vitro* model of SE (**Fig. 6A**). We noticed that GABAergic interneurons were highly active during the LRD phase (**Fig6. C,D**). To determine whether the activity of GABAergic interneurons was synchronised with that of pyramidal cells we used linear correlation as a measure of synchrony (Jiruska *et al.*, 2013). We compared the synchrony during baseline, single SLEs, during the LRD phase and following cessation of epileptiform activity (post-LRD). The correlation and hence synchrony between interneurons and pyramidal cells was increased during SLEs and LRD as compared to pre and post epileptiform activity (baseline  $r = 0.22 \pm 0.03$ , SLEs  $r = 0.62 \pm 0.01$ , LRD  $r = 0.90 \pm 0.02$ , post  $r = 0.29 \pm 0.03$ ,  $p < 0.0001$ , *paired t-tests*, **Fig6. D,E**). Synchrony between these two cell types was significantly higher during LRD as compared to SLEs ( $r = 0.90$  vs  $r = 0.62$ ,  $p < 0.0001$ , *paired t-test*), which demonstrates that persistent epileptiform activity is composed of highly synchronous activity between GABAergic interneurons and glutamatergic pyramidal cells.

### *GABAergic signalling is strongly depolarising during the late recurrent discharge phase*

Given our observations of a depolarizing  $E_{\text{GABA}}$  and highly synchronized GABAergic interneuronal and pyramidal cell activity during the SE-like activity of the LRD phase, we next explored whether the GABAergic signalling might in fact be excitatory during LRD. To investigate this, we used an optogenetic approach to isolate and selectively activate Chr2-expressing GABAergic (GAD2+) interneurons during different phases of seizure-like activity.

Using this experimental setup, GABAergic interneurons were activated every 7s with 100ms of

blue light whilst performing whole-cell current-clamp recordings from CA1 pyramidal neurons during the progression of seizure-like activity in the 0 Mg<sup>2+</sup> model.

We observed that whilst light activation resulted in hyperpolarizing synaptic potentials under baseline conditions, (**Fig. 7A-C**), during single SLEs, light delivery reliably triggered membrane depolarisation and the generation of action potentials (**Fig. 7B,C**). In-between SLEs, the hyperpolarising responses to optogenetic activation were restored. However, during the SE-like LRD phase, light activation again consistently resulted in strong depolarisation and action potentials in the recorded neurons (**Fig. 7C**).

We then repeated this with cells held at -40 mV in the voltage-clamp configuration in order to record light-induced synaptic currents. At rest these were outward (positive), with a mean value of  $448.80 \pm 70.34$  pA ( $n = 7$ ) but rapidly flipped to being inward (negative) during SLEs ( $-752 \pm 88.67$  pA,  $p = 0.0002$ , *paired t-test*, **Fig. 7D-F**). After SLEs had self-terminated, light-induced currents returned to positive values ( $536.50 \pm 134.90$  pA,  $p = 0.0007$ ). During the LRD phase, the currents recorded in pyramidal neurons following optogenetic activation of GABAergic interneurons again became significantly negative reaching mean values of  $-894.00 \pm 164.80$  pA ( $p = 0.0018$ , *paired t-test*). This could be reversed when persistent epileptiform activity was terminated using reintroduction of Mg<sup>2+</sup>-containing aCSF, resulting in positive currents with a mean value of  $242.00 \pm 21.21$  pA. There was no significant difference in amplitude between light-induced currents during SLE and LRD ( $-752.00 \pm 88.67$  pA vs  $-894.00 \pm 164.80$  pA,  $p = 0.18$ , *paired t-test*). This demonstrated that GABAergic interneurons have profound excitatory effects on their synaptic targets during persistent epileptiform activity in the 0 Mg<sup>2+</sup> model.

*Optogenetic activation of GABAergic interneurons triggers epileptiform discharges and entrains the hippocampal network during persistent epileptiform activity in a GABA<sub>A</sub>R dependent manner.*

Our data suggests that the GABAergic inhibitory system becomes ineffective during SE-like activity due to changes in chloride homeostasis and this could explain the failure of diazepam to reduce seizure-like activity during this phase. To further test this hypothesis, we next sought to determine whether recruitment of GABAergic interneurons fails to inhibit epileptiform activity during LRD and furthermore, whether selective activation of interneurons results in more pro-seizure like effects than anti-seizure activity as was witnessed following diazepam application in our preparation.

During a one minute analysis period during the LRD phase, we analysed our traces in 7 s frame windows to determine what effect selective activation of GABAergic interneurons (100 ms blue light activation occurring 3.5 s into the 7 s window) had on epileptiform activity. This 7 s window was then divided into smaller 200 ms time bins whereby the probability of an epileptiform discharge being initiated could be calculated (**Fig. 8A-D**). Discharges were defined as inward currents greater than 10 standard deviations from baseline noise and lasting more than 500 ms. We observed that the probability of discharge initiation increased to  $0.78 \pm 0.06$  during the 200 ms immediately following light application. In a control experiment ( $n = 7$ ) repetitive light activation was initiated after a minimum of five minutes of LRD activity had occurred. The probability of discharge initiation within the 200 ms time bin 3.5 s into the 7 window increased from  $0.06 \pm 0.02$  before the light pulses were delivered to  $0.53 \pm 0.09$  when the light was delivered at the start of this time bin ( $p = 0.002$ , *paired t-test*, **Fig. 8E-I**).

Having established that optogenetic activation of GABAergic interneurons reliably initiated epileptiform discharges during SE-like activity, we next sought to determine whether excitatory GABA<sub>A</sub>R synaptic signalling was responsible for this effect. To do so we added the GABA<sub>A</sub>R blocker picrotoxin (100 μM) to the perfusing aCSF after at least 5 minutes of LRD activity had been induced (**Fig. 8J - N**). The picrotoxin did not arrest the LRD activity demonstrating that GABA<sub>A</sub>R mediated synaptic transmission is not necessary for the generation of these discharges ( $n = 6$ ). However, we did note that the probability of discharge initiation following optogenetic activation of GABAergic interneurons decreased significantly from  $0.64 \pm 0.08$  to  $0.08 \pm 0.03$  following GABA<sub>A</sub>R blockade with picrotoxin ( $p = 0.03$ , *Wilcoxon test*, **Fig. 8J - N**). This confirmed that GABA<sub>A</sub>R mediated transmission is necessary for the pro-seizure properties of the GABAergic interneuronal network during LRD.

Finally, we measured changes in the frequency of epileptiform discharges during LRD when GABAergic interneurons were optogenetically activated at 0.14 Hz ('On'), when the light was not applied ('Off') and when optogenetic activation occurred in the presence of 100 μM picrotoxin ('Px'). As demonstrated in **Fig. 8O and P**, in the 'On' condition, the frequency of discharges was entrained either to the frequency of light delivery (0.14 Hz) or twice the frequency (0.28Hz), indicating one 'break through' discharge every cycle. By comparison, if there was no light activation or picrotoxin was present, there was a wide distribution of discharge frequencies. In addition, there was a significantly smaller difference between the frequency at which the light was delivered and the frequency of discharges between the 'On' group ( $0.06 \pm 0.02$  Hz) as compared to the 'Off' ( $0.12 \pm 0.03$  Hz,  $p = 0.03$ , *Mann-Whitney test*) and picrotoxin groups ( $0.13 \pm 0.02$  Hz,  $p = 0.02$ , *Mann-Whitney test*, **Fig. 8Q**). Taken together this data demonstrates that GABAergic

interneurons are ineffective at curtailing epileptiform discharges during SE-like activity and can enhance epileptiform activity.

## Discussion

In our study we have used both clinical and experimental data to explore the phenomenon of benzodiazepine-resistant SE. We find that the prevalence of benzodiazepine resistance in a South African cohort of paediatric patients in SE is similar to that observed internationally (Chin *et al.*, 2008). In addition, our clinical data also confirms several prior observations, that actually provide some critical insights into the underlying pathology and clinical management. Firstly, benzodiazepine resistant SE is associated with increased morbidity in patients (Chin *et al.*, 2008). Secondly, the proportion of patients who responded patients who seize for longer prior to initial treatment were more likely to be resistant to benzodiazepine treatment. While previous studies and reviews have eluded to longer SE duration being associated with increased resistance to benzodiazepines (Deeb *et al.*, 2012; Naylor, 2014; Fernández *et al.*, 2015), our clinical data is the first to quantify this phenomenon. Notably, we show that the duration of SE can successfully be used as a binary classifier to detect benzodiazepine resistance in SE. In our patient population, the optimum threshold for discriminating between benzodiazepine resistant vs sensitive patients was 61 mins of seizure activity.

Given the clinical importance of this phenomenon, and our observation that diverse brain insults causing prolonged seizures can all result in benzodiazepine resistance, we used the 0 Mg<sup>2+</sup> *in vitro* model of SE to identify multiple changes in GABAergic signalling that could explain the progressive loss of diazepam efficacy in this condition. SE-like activity was accompanied by a modest reduction in GABA synaptic conductance and persistent changes in the efficacy of Cl<sup>-</sup>

extrusion. However, our major observation was profound short-term, activity-dependent Cl<sup>-</sup> accumulation during SE-like activity. As a result, optogenetic activation of GABAergic interneurons was ineffective at reducing epileptiform activity; on the contrary, GABAergic interneuron firing actually enhanced epileptiform discharges during SE, via excitatory GABA<sub>A</sub>R mediated synaptic transmission. This activity-dependent effect is supplemental to two other changes we document, namely the reduced KCC2 expression, and the associated shift in baseline E<sub>GABA</sub>. Together, these results demonstrate why benzodiazepines may fail to enhance inhibition in continuously seizing brain circuits.

The withdrawal of Mg<sup>2+</sup> *in vitro* has long been used as a model for studying putative changes in GABAergic signalling during SE (Dreier and Heinemann, 1991; Goodkin *et al.*, 2005; Albus *et al.*, 2008). Dreier *et al.* (1998) were the first to demonstrate that benzodiazepines lose their anticonvulsant efficacy following the onset of the SE-like LRD phase in the 0 Mg<sup>2+</sup> model. We extend this work by demonstrating that during SE-like activity, not only do benzodiazepines lose their anticonvulsant action, but further, they can even exacerbate seizure-like activity. We suggest that the effects of diazepam during SE we observe are not explained by previously described deficits in GABA<sub>A</sub>R trafficking on principal cells alone (Goodkin *et al.*, 2008), but also by a transient collapse in the transmembrane Cl<sup>-</sup> gradient and E<sub>GABA</sub>.

Previous reports suggest that on-going seizure activity results in reduced surface expression, and function, of the canonical Cl<sup>-</sup> extruder KCC2 (Rivera *et al.*, 2004). KCC2 ensures that Cl<sup>-</sup> is maintained at levels lower than would be predicted by passive processes and also ameliorates activity-dependent Cl<sup>-</sup> loading (Düsterwald *et al.*, 2018). Loss of KCC2, therefore, constitutes a double blow to the system, since it will cause a rise in baseline intraneuronal [Cl<sup>-</sup>], and reduce the

rate of clearance of  $\text{Cl}^-$ , meaning that activity-dependent  $\text{Cl}^-$  loading is exacerbated. We have shown both effects are important. Our findings confirm that the progression to SE-like activity in the  $0 \text{ Mg}^{2+}$  model is accompanied by a reduction in KCC2 surface expression and function as evidenced by a progressive depolarization of resting  $E_{\text{GABA}}$  prior to and following SE-like activity. We then also showed the additional importance of short-term, activity-dependent, increases in  $\text{Cl}^-$ . These have previously been demonstrated during single SLEs both *in vitro* and *in vivo* (Isomura *et al.*, 2003; Ellender *et al.*, 2014; Sato *et al.*, 2017), but our new data represents the first time this has been shown to be a factor in persistent SE-like activity. Our gramicidin perforated patch-clamp recordings and  $\text{Cl}^-$  imaging measurements using the genetically encoded ratiometric reporter ClpHensorN demonstrate that both single SLEs and SE-like activity result in substantial intracellular  $\text{Cl}^-$  accumulation and an excitatory shift in  $E_{\text{GABA}}$ . In support of this idea, reducing the function of KCC2 accelerates the transition to SE both *in vitro* (Kelley *et al.*, 2016) and *in vivo* (Silayeva *et al.*, 2015).

Seizures are able to start and spread due to a loss of inhibitory synaptic mechanisms which are typically recruited to “restrain” excitability within brain circuits (Trevelyan *et al.*, 2006; Trevelyan *et al.*, 2007; Trevelyan and Schevon, 2013). Ongoing failure of inhibitory restraint also underlies the ability of seizures to perpetuate in time and space. Inhibitory restraint can fail due to reduced GABA release (Zhang *et al.*, 2012), GABA<sub>A</sub>R internalization (Goodkin *et al.*, 2005), a depolarizing shift in pyramidal  $E_{\text{GABA}}$  (Lillis *et al.*, 2012) or GABAergic interneurons entering a state of depolarization block (Ziburkus *et al.*, 2006; Cammarota *et al.*, 2013). Knowing which of these mechanisms are involved in SE, and to what extent, will be important for designing optimal strategies for aborting seizures, especially given recent interest in using optogenetic strategies to enhance the action of GABAergic interneurons (Krook-Magnuson *et al.*, 2013; Krook-Magnuson



and Soltesz, 2015). Using dual whole-cell patch-clamp recordings, we found a very high correlation between hippocampal GABAergic interneuronal and pyramidal cell activity during the LRD phase. Optogenetic activation of the pan-interneuronal population using ChR2 expression driven by the GAD2 promoter revealed that activation of GABAergic interneurons has a broadly similar effect on epileptiform activity as diazepam in our model. Interneurons are inhibitory prior to SLEs and excitatory during SE-like activity. We found that optical activation of the pan-interneuronal population was sufficient to entrain the frequency of epileptiform discharges to the frequency of light activation during the SE-like phase, and that this entrainment is dependent on intact synaptic transmission via GABA<sub>A</sub>Rs. This provides strong evidence about three key aspects of interneuronal function during the early phase of SE: that GABAergic interneurons are able to release GABA, they are not in depolarizing block, and sufficient postsynaptic GABA<sub>A</sub>Rs are present to mediate GABAergic synaptic transmission. However, due to the transient and widespread collapse of the postsynaptic Cl<sup>-</sup> gradient in pyramidal neurons, GABAergic interneurons are ineffective at curtailing epileptiform discharges, and in fact drive the generation of these events during SE-like activity. Our data complements recent *in vitro* and *in vivo* results, which suggest that various GABAergic interneuronal subtypes may promote the extension of seizures when activated once epileptiform activity has become established (Ellender *et al.*, 2014; Sato *et al.*, 2017; Magloire *et al.*, 2018).

Our observation of excitatory GABA<sub>A</sub>R mediated signaling during the LRD phase explains the loss of inhibitory efficacy and the pro-epileptiform effects of diazepam we observe during the LRD phase. This supports prior work in dissociated cell cultures which demonstrated that activity-driven changes in the Cl<sup>-</sup> gradient reduce the inhibitory efficacy of diazepam (Deeb *et al.*, 2013).

Together, this suggests that benzodiazepines can lose their efficacy in SE even with GABA<sub>A</sub>Rs intact.

Given our experimental findings, it is worth considering why benzodiazepines are often effective in terminating SE in patients (in our study 52% of patients with SE responded to benzodiazepine administration). Organotypic hippocampal brain slices represent a relatively small, well connected brain circuit, where most areas of the slice are typically involved in SE-like activity (Ellender *et al.*, 2014). This means that most pyramidal cells in the slice will experience an activity-dependent collapse of the Cl<sup>-</sup> gradient, which will render benzodiazepines ineffective during prolonged seizures. In patients with SE, the situation is likely to be different. The proportion of brain circuits effected by activity-dependent Cl<sup>-</sup> accumulation will vary considerably between patients depending on the seizure type as well as the extent to which different brain areas are recruited into the seizure process. Interactions between areas may also be critical in providing pacemaker drives (Codadu *et al.*, 2018), thereby maintaining a high rate of discharge, but breaking this loop by slightly reducing the intrinsic rate at a particular site may be all that is required. In regions where intracellular Cl<sup>-</sup> and E<sub>GABA</sub> are still low, benzodiazepines will enhance inhibitory restraint. Therefore, determining the potential cumulative effect of benzodiazepines will involve a dynamic contest between areas where it enhances inhibition and those areas where it is ineffective or promotes hyperexcitability.

Given the demonstrated potential for benzodiazepines to be ineffective, or even promote seizure prolongation in SE, we recommend investigation of alternative or adjunctive therapeutic strategies for terminating SE. These could involve strategies for enhancing Cl<sup>-</sup> extrusion capacity to help maintain E<sub>GABA</sub> (Gagnon *et al.*, 2013; Alfonsa *et al.*, 2016; Moore *et al.*, 2017; Magloire *et al.*,

2018), or targeting of other brain inhibitory systems including modulating pH (Tolner *et al.*, 2011), postsynaptic K<sup>+</sup> conductance or presynaptic release (Ilie *et al.*, 2012). For example, co-application of flurpitine (which opens M-type potassium channels) with diazepam is highly effective in terminating SE in animal models (Zhang *et al.*, 2017). Finally, since the degree of Cl<sup>-</sup> loading is dictated by the relative rates of entry and clearance, it may be possible to restore benzodiazepine efficacy by slowing the rate of discharges. This, after all, is what appears to occur typically in seizures which self-terminate.

In summary, our findings support the idea that dynamic network changes and ionic mechanisms underlie persistent seizure activity and that an enhanced understanding of these alterations will guide the development of more effective strategies for treating SE.

## Figure Legends

**Figure 1: Resistance to first-line benzodiazepine treatment increases with the duration of status epilepticus and is associated with increased morbidity.** **A**, Proportion of paediatric patients presenting with convulsive status epilepticus (CSE) resistant (bzipR, red) or sensitive (bzipS, black) to first-line treatment with benzodiazepines. **B**, Benzodiazepine resistance was associated with longer hospital stays and **C**, these patients were more likely to require admission to the paediatric intensive care unit (PICU). **D**, There was no difference in underlying aetiology between the groups when dividing causes into four categories: ‘Acute’, acute illness; ‘Remote’, previous brain injury; ‘Syndrome’, established electroclinical syndrome; ‘Unknown’, no aetiology found during admission. **E**, Top, cumulative frequency plot of bzipR (red) and bzipS (black) patients as a function of seizure duration prior to treatment. Bottom, increased SE duration is associated with enhanced probability of benzodiazepine resistance. The optimum discrimination threshold for separating bzipR from bzipS patients calculated using ‘F’ is indicated by the grey dashed line. **F**, ROC curve, analysing how well the SE duration classifies the likelihood of benzodiazepine sensitivity or resistance. Top right corresponds to short SE durations; bottom left to long SE durations. The maximal difference between the true and false positive rates occurs when the classifier is set at 61mins (grey circle).

**Figure 2: Early application of diazepam has an anticonvulsant effect while late application is ineffective and augments epileptiform bursting activity in an *in vitro* model of status epilepticus.** **A**, Schematic showing how local field potential recordings were performed in the CA1 region of organotypic hippocampal slices using an interface perfusion chamber. **B**, The 0  $Mg^{2+}$  chemoconvulsant model was used as an *in vitro* model of status epilepticus (SE). Upon  $Mg^{2+}$  withdrawal, activity progressed from single seizure-like events (SLEs, orange bars) to a phase where recurrent discharges occurred unabated, the late recurrent phase (LRD, blue bar). **C**, Control experiment where 0  $Mg^{2+}$  was washed in after 5-10 minute calibration period in standard aCSF. Time to SLE onset (orange) and entry into the LRD phase (blue) are shown. **D**, Early application of diazepam (3 $\mu$ M) introduced when 0  $Mg^{2+}$  was washed in. **E**, Late group where diazepam was washed in after the LRD phase had been established. Windows  $t_{1-3}$  highlight 60s of LRD used for analysis. **F**, Population data showing that early diazepam application delays the onset of SLEs while decreasing SLE frequency (**G**) and retarding onset of LRD (**H**). **I-K**, 60s traces

corresponding with windows marked  $t_{1-3}$ . Top trace is local field potential recording with its associated spectrogram below. Population data showing that the presence of diazepam during LRD increases burst duration (**L**) with no effect on inter-discharge interval (**M**). **N**, The presence of diazepam also significantly increased the power in the 1-40Hz bandwidth. ‘DZP’, diazepam.  $*p \leq 0.05$ ;  $**p \leq 0.01$ ; ‘ns’, not significant ( $p \geq 0.05$ ).

**Figure 3: Persistent epileptiform activity is associated with a reduction in GABAergic synaptic conductance.** **A**, Schematic of experimental setup showing whole-cell recordings being performed from CA1 pyramidal neurons in mouse organotypic brain slices where GAD2+ interneurons were transfected with ChR2-YFP and activated using a high-powered LED coupled to the objective. **B**, Example GABA I-V plot from a whole-cell patch-clamp recording (low  $Cl^-$  internal, 10 mM) of a CA1 pyramidal cell in a mouse hippocampal organotypic slice. Inset, raw current traces recorded at different holding potentials. GABA were evoked by optogenetic activation of ChR2 expressing GAD2+ interneurons with 100 ms blue light pulses. GABA conductance ( $g_{GABA}$ ) was calculated from the slope of the GABA current I-V curve. The GABA current was calculated by subtracting the holding current (black line on inset) from the total current (blue line on inset) for each holding potential. **C**, Example GABA I-V plot from the same cell as in ‘B’ following cessation of persistent epileptiform activity generated by 30 min of 0  $Mg^{2+}$  application. **D**, Population data showing a significant decrease in  $g_{GABA}$  from baseline to after 30 min 0  $Mg^{2+}$ .  $****p \leq 0.0001$ .

**Figure 4: SE-like activity is associated with compromised neuronal  $Cl^-$  extrusion.** **A**, Schematic demonstrating the gramicidin perforated patch-clamp recording configuration from organotypic hippocampal pyramidal cells and accompanying somatic GABA application. **B**, Example recording from a mouse CA1 pyramidal neuron. Resting  $E_{GABA}$  was measured by delivering GABA puffs at different holding potentials (inset). I-V curves were then plotted featuring the holding current (reflecting membrane current, black) and total current (reflecting membrane current plus the GABA-evoked current, blue).  $E_{GABA}$  was calculated as the potential at which the total current (blue line) was equal to the holding current (black line). **C**, Following 30 mins of  $Mg^{2+}$  withdrawal, epileptiform activity was arrested by reintroducing  $Mg^{2+}$  into the aCSF and resting  $E_{GABA}$  was once again measured as in ‘B’. **D**, Population data showing a significant

increase in  $E_{GABA}$  between baseline and after a period of persistent seizure-like activity induced by 30 minutes of  $0 \text{ Mg}^{2+}$  application. **E**, Population data from a similar experiment as in 'F' from rat organotypic brain slices cultures and 3 hours of  $\text{Mg}^{2+}$  withdrawal demonstrating a further increase in  $E_{GABA}$  following this extended period of persistent epileptiform activity. **F**, Western blots of control hippocampal slices, and those that had been treated with 3 hours of  $0 \text{ Mg}^{2+}$ . Cell homogenates ('T'-total) and NeutrAvidin captured cell surface proteins ('S'-surface) were probed on western blots with the anti-C-terminus KCC2 antibody.  $0 \text{ Mg}^{2+}$  blots showed weaker bands for surface-bound KCC2 dimers, but little change in monomers compared to controls. **G**, Surface proteins from hippocampal slice lysates were quantified by the ratio of surface to total optical density. Values were then normalised to a percentage of untreated control values. Three hours of  $0 \text{ Mg}^{2+}$  treatment significantly reduced the surface:total ratio of overall KCC2 as compared to controls. This change reflected a specific reduction in the surface levels of KCC2 dimers.  $*p \leq 0.05$ ;  $**p \leq 0.01$ ; 'ns', not significant ( $p \geq 0.05$ ).

**Figure 5: Persistent seizure-like activity drives pronounced depolarizing shifts in  $E_{GABA}$  and intracellular  $\text{Cl}^-$  accumulation.** **A**, To measure  $E_{GABA}$  during epileptiform activity, gramicidin perforated patch-clamp recordings were performed and the recording mode was rapidly switched from current-clamp (CC) to brief periods in voltage clamp (1.5 s duration) every 10 s (inset). While in voltage-clamp, two consecutive voltage ramps were applied: (1) the first without GABA application; and the second paired with GABA application (blue) applied to the soma. A representative recording from a CA1 pyramidal neuron where  $E_{GABA}$  measurements (blue dots) were made throughout the progression of epileptiform activity in the  $0 \text{ Mg}^{2+}$  model (orange arrows shows SLEs, blue bar depicts LRD). Dotted lines highlight periods during evolution of epileptiform activity: baseline ( $t_1$ ), immediately following SLEs ( $t_2$ ), between SLEs / interictal ( $t_3$ ), LRD ( $t_4$ ), following termination of activity / post-LRD ( $t_5$ ). To rapidly abort epileptiform activity during LRD, TTX ( $50 \mu\text{M}$ ) was applied. Bottom, I-V plots were used to calculate  $E_{GABA}$  defined as the voltage at which the GABA current equals 0 ( $t_{1-5}$ ). **B**, Population data showing significant changes in  $E_{GABA}$  between the different periods. Note pronounced shifts in  $E_{GABA}$  accompanying SLEs and LRD. **C**, A schematic showing the experimental setup for  $\text{Cl}^-$  imaging in which hippocampal pyramidal neurons expressing ClopHensorN were imaged, while a simultaneous patch-clamp recording was performed from a neighboring neuron. To determine  $[\text{Cl}^-]_i$ , confocal

images were collected following excitation at 458, 488, and 563nm, respectively. **D**, Confocal images of the neuron in ‘E’ with the 458 nm and 563 nm fluorescence emission channels superimposed during baseline (top) and LRD (bottom). The fluorescence ratio from these channels (F458/F563) is sensitive to  $[Cl^-]_i$ , hence the shift to pink during LRD indicates an increase in  $[Cl^-]_i$ . **E**, Simultaneous measurement of activity-dependent changes in  $[Cl^-]_i$  in a CA1 hippocampal pyramidal neuron expressing ClopHensorN (green trace, bottom). A current-clamp recording from a neighbouring pyramidal neuron (black trace, top; cell somata  $<200\mu\text{m}$  apart) provided a readout of epileptiform activity, including SLEs (orange arrows) and LRD (blue bar). **F**, Population data showing significant increases in  $[Cl^-]_i$  associated with LRD compared to baseline activity.  $*p \leq 0.05$ ;  $**p \leq 0.01$ ;  $****p \leq 0.0001$ .

**Figure 6: GABA-releasing interneurons are active and highly correlated with pyramidal cell activity during the late recurrent discharge phase.** **A**, Diagram of the experimental setup (top), which involved simultaneous whole-cell patch-clamp recordings from CA1 pyramidal neurons and GABAergic interneurons in organotypic hippocampal brain slices. Inset, confocal images shows interneurons in the stratum radiatum expressing tdTomato using the cre-lox system (tdTomato reporter line crossed with GAD2-cre line). **B**, GABAergic connection between pyramidal cell (black) and GAD2<sup>+</sup> interneuron (red) confirmed by observing negative shifts in the pyramidal cell membrane potential when action potentials were generated in the interneuron. **C**, Dual current-clamp recordings from the same cells in ‘B’ during progression of 0  $\text{Mg}^{2+}$  seizure-like activity. Four periods are denoted by dashed rectangles: baseline ( $t_1$ ), at the start of a single SLE ( $t_2$ ), during the LRD phase ( $t_3$ ) and after epileptiform activity had been aborted with the re-introduction of 1  $\text{mM}$   $\text{Mg}^{2+}$ , post-LRD ( $t_4$ ). **D**, Insets show the four periods in ‘C’, with recordings from the two neurons superimposed to reveal the extent of synchronous activity. The Pearson’s coefficient ( $r$ ) was calculated from a direct linear correlation of the two raw traces during each epoch (8 s duration). **E**, Population data showing significant increases in correlation during single SLEs ( $t_2$ ) and the LRD phase ( $t_4$ ). ‘GAD2’, glutamic acid decarboxylase 2; ‘ns’, non-significant; ‘SR’, stratum radiatum; ‘Td’, tandem dimeric tomato.  $****p \leq 0.0001$ ; ‘ns’, not significant ( $p \geq 0.05$ ).



**Figure 7: GABAergic signalling is strongly depolarising during the late recurrent discharge phase.** **A**, Experimental setup showing whole-cell recordings being performed from CA1 pyramidal neurons in mouse organotypic brain slices where GAD2<sup>+</sup> interneurons were transfected with Chr2-YFP and activated using a high-powered LED coupled to the objective. **B**, Current-clamp recording with optogenetic activation of GAD2<sup>+</sup> interneurons every 7s using 100 ms light pulses during the evolution of epileptiform activity in Mg<sup>2+</sup>-free solution. Individual SLEs (orange bars) and LRD are indicated (blue bar). The persistent activity of the LRD phase was terminated using aCSF containing 1mM Mg<sup>2+</sup>. The dashed rectangles  $t_{1-6}$  represent 30 s windows from different periods: baseline ( $t_1$ ), latter portion of a SLE ( $t_2$ ), interictal period ( $t_3$ ), LRD ( $t_4$ ), LRD ending ( $t_5$ ) and post-LRD ( $t_6$ ). **C**, Expanded view of the windows  $t_{1-6}$  in ‘**B**’ show optogenetic activation of GAD2<sup>+</sup> interneurons (blue bars) shifting from causing membrane hyperpolarisation during baseline and interictal periods to membrane depolarisation and action potentials during SLEs and LRD. These effects were transient with the cessation of LRD resulting in a return of IPSPs. **D**, Voltage-clamp recording from CA1 pyramidal cell clamped at -40 mV to record light-induced currents using the protocol as in ‘**B**’. Dashed rectangles representing the same periods as in ‘**B**’. **E**, Expanded views of  $t_{1-6}$  showing changes in the maximum light-induced currents at each phase of activity. Light currents flip from being outward during baseline and interictal periods to inward during SLEs and LRD. **F**, Population data showing significant changes in current size and direction across the different phases. Light currents were recorded as the maximum light induced current within 100 ms of the light pulse. \*\*\* $p \leq 0.001$ .

**Figure 8: Optogenetic activation of GABAergic interneurons during LRD triggers burst discharges and entrains the hippocampal network in a GABA<sub>A</sub>R dependent manner.**

**A**, Experimental schematic showing whole-cell patch-clamp recordings from CA1 pyramidal neurons with widefield optogenetic activation of GAD2<sup>+</sup> interneurons. **B**, Voltage-clamp recording during LRD from a cell clamped at -40 mV with 100 ms blue light pulses delivered once every 7 s.  $t_1$  is a 60 s window of activity which is expanded in **C** showing epileptiform discharges reliably initiated by optogenetic activation of GAD2<sup>+</sup> interneurons. **D**, Population data from 7 slices. Left axis (black, histograms with  $\pm$  SEM) represents the probability of a discharge being initiated in any given 200 ms time bin within a 7 s window from a 5 min LRD analysis period. Light blue highlights the time bin where light was delivered 3.5 s into the 7 s window. The right



axis (blue, line plot with  $\pm$  SEM) represents the probability of a discharge being present. **E**, Trace showing a 10 min window from the onset of LRD.  $t_2$  and  $t_3$  are 60 second periods of activity before and after blue light was delivered as in ‘**B**’. **F**, Expanded  $t_2$  and  $t_3$  showing 100 ms blue light application (blue bars) reliably initiating discharges. **G**, Population data ( $n = 7$ ) as in ‘**D**’ from 5 min analysis periods during LRD prior to light activation. **H**, Same analysis as in ‘**G**’ for 5 min analysis periods from the same slices where 100 ms blue light was delivered 3.5 s into every 7 s window. **I**, Discharge probability significantly increased in the time window where blue light was applied. **J**, 10-minute window from the onset of LRD with light-stimulus delivered every 7 seconds. After at least 5 minutes of LRD activity, picrotoxin (100  $\mu$ M) was applied.  $t_4$  and  $t_5$  are 60 s periods of activity before and after picrotoxin (orange) application. **K**, Expanded views of  $t_4$  and  $t_5$  demonstrating that light delivery (blue bars) no longer elicited discharges. **L**, Population data ( $n = 6$ ) as in ‘**D**’ from the 5 min analysis window prior to picrotoxin application. **M**, Data from the same recordings as in ‘**L**’ for a 5 min analysis period in the presence of picrotoxin. **N**, Discharge probability significantly decreased in the time bin following blue light application in the presence of picrotoxin. **O**, Cumulative percentage plot showing the distribution of discharge frequencies across three groups, control with photoactivation (‘On’, blue,  $n = 20$ ), no photoactivation (‘Off’,  $n = 7$ ) and photoactivation in the presence of picrotoxin (‘Px’,  $n = 6$ ). Grey lines mark x1 and x2 the frequency of the light stimulus (0.14Hz and 0.28Hz). **P**, Population data of discharge frequencies. **Q**, The difference between frequency of photoactivation (x1 grey line in ‘**O**’) and the observed frequency of discharges within a 5 min analysis window. In the ‘On’ group, this difference was significantly smaller compared to the ‘Off’ and Px groups.  $*p \leq 0.05$ ;  $**p \leq 0.01$ .

**Supplementary Figure 1: Diazepam enhances GABA<sub>A</sub>R mediated currents in mouse hippocampal organotypic brain slice cultures.** **A**, Diagram of the experimental setup, involving whole-cell patch-clamp recordings in organotypic slices where Chr2-YFP and tdTomato were expressed in GABA producing (glutamic acid decarboxylase type 2 / GAD2 cells) using the cre-lox system. Inset, confocal microscopy image demonstrating cytoplasmic expression of tdTomato and membrane localisation of Chr2-YFP. **B**, Chr2 activation using a blue LED (470 nm at 17.1 mW, 100ms) reliably elicited action potentials in fluorescent neurons (top) and hyperpolarizing IPSPs in CA1 pyramidal cells (bottom). **C**, Whole-cell voltage clamp recordings with a high Cl<sup>-</sup>

internal (141 mM) containing QX314 (5  $\mu$ M) and held at -40 mV in the presence of the GABA<sub>B</sub> receptors blocker, CGP55845 (10  $\mu$ M), to elicit GABA<sub>A</sub>R synaptic currents (GSCs) following blue light activation of the Chr2-expressing GABAergic interneurons. **D**, The mean amplitude of GSCs calculated from 30 traces from each cell recorded under three conditions: baseline (B, black), following 5 min wash-in of 3 $\mu$ M diazepam (D, red), and a further 5 min wash in of the benzodiazepine antagonist 0.4  $\mu$ M flumazenil (F, purple). **E**, The decay phase of GSCs recorded in 'C' and normalized to the maximum GSC amplitude. **F**, Population data demonstrating that the decay time constant ( $\tau$ ) was significantly increased in the presence of diazepam.  $**p \leq 0.01$ ; 'ns', not significant ( $p \geq 0.05$ ).

## Acknowledgements

Thanks are given to Hayley Tomes and Buchule Mbobo who provided assistance with the data collection.

## Funding

RJB was funded by the Mandela Rhodes Foundation and the Medical Research Council of South Africa. The research leading to these results has received funding from ERC grant agreement number 617670, a Royal Society Newton Advanced Fellowship and a University of Cape Town Start-up Emerging Researcher Award to JVR and grant support from the Blue Brain Project and the National Research Foundation of South Africa. In addition, RW and AC were supported by Wellcome Trust Doctoral Fellowships and SEN was supported by a Royal Society Dorothy Hodgkin Fellowship.

## Competing interests

The authors have nothing to declare.

## References

- Albus K, Wahab A, Heinemann U. Standard antiepileptic drugs fail to block epileptiform activity in rat organotypic hippocampal slice cultures. *British journal of pharmacology* 2008; 154(3): 709-24.
- Alfonsa H, Lakey JH, Lightowlers RN, Trevelyan AJ. Cl-out is a novel cooperative optogenetic tool for extruding chloride from neurons. *Nature communications* 2016; 7: 13495.
- Anderson WW, Lewis DV, Swartzwelder HS, Wilson WA. Magnesium-free medium activates seizure-like events in the rat hippocampal slice. *Brain research* 1986; 398(1): 215-9.
- Appleton R, Choonara I, Martland T, Phillips B, Scott R, Whitehouse W, *et al.* The treatment of convulsive status epilepticus in children. *Archives of Disease in Childhood* 2000; 83(5): 415-9.
- Arosio D, Ricci F, Marchetti L, Galdani R, Albertazzi L, Beltram F. Simultaneous intracellular chloride and pH measurements using a GFP-based sensor. *Nature methods* 2010; 7(7): 516.
- Boggs JG. Mortality associated with status epilepticus. *Epilepsy currents* 2004; 4(1): 25-7.
- Cammarota M, Losi G, Chiavegato A, Zonta M, Carmignoto G. Fast spiking interneuron control of seizure propagation in a cortical slice model of focal epilepsy. *The Journal of physiology* 2013; 591(4): 807-22.
- Chin RF, Neville BG, Peckham C, Wade A, Bedford H, Scott RC. Treatment of community-onset, childhood convulsive status epilepticus: a prospective, population-based study. *The Lancet Neurology* 2008; 7(8): 696-703.
- Codadu NK, Parrish RR, Trevelyan AJ. Region-specific differences and areal interactions underlying transitions in epileptiform activity. *bioRxiv* 2018: 435156.
- Deeb TZ, Maguire J, Moss SJ. Possible alterations in GABAA receptor signaling that underlie benzodiazepine-resistant seizures. *Epilepsia* 2012; 53: 79-88.
- Deeb TZ, Nakamura Y, Frost GD, Davies PA, Moss SJ. Disrupted Cl<sup>-</sup> homeostasis contributes to reductions in the inhibitory efficacy of diazepam during hyperexcited states. *European Journal of Neuroscience* 2013; 38(3): 2453-67.
- Dreier J, Heinemann U. Regional and time dependent variations of low Mg<sup>2+</sup> induced epileptiform activity in rat temporal cortex slices. *Experimental brain research* 1991; 87(3): 581-96.

Dreier J, Zhang CL, Heinemann U. Phenytoin, phenobarbital, and midazolam fail to stop status epilepticus-like activity induced by low magnesium in rat entorhinal slices, but can prevent its development. *Acta neurologica scandinavica* 1998; 98(3): 154-60.

Düsterwald KM, Currin CB, Burman RJ, Akerman CJ, Kay AR, Raimondo JV. Biophysical models reveal the relative importance of transporter proteins and impermeant anions in chloride homeostasis. *eLife* 2018; 7: e39575.

Ellender TJ, Raimondo JV, Irkle A, Lamsa KP, Akerman CJ. Excitatory effects of parvalbumin-expressing interneurons maintain hippocampal epileptiform activity via synchronous afterdischarges. *Journal of Neuroscience* 2014; 34(46): 15208-22.

Fernández IS, Abend NS, Agadi S, An S, Arya R, Brenton JN, *et al.* Time from convulsive status epilepticus onset to anticonvulsant administration in children. *Neurology* 2015; 84(23): 2304-11.

Fujiwara-Tsukamoto Y, Isomura Y, Imanishi M, Ninomiya T, Tsukada M, Yanagawa Y, *et al.* Prototypic seizure activity driven by mature hippocampal fast-spiking interneurons. *Journal of Neuroscience* 2010; 30(41): 13679-89.

Gagnon M, Bergeron MJ, Lavertu G, Castonguay A, Tripathy S, Bonin RP, *et al.* Chloride extrusion enhancers as novel therapeutics for neurological diseases. *Nature medicine* 2013; 19(11): 1524.

Glauser T, Shinnar S, Gloss D, Alldredge B, Arya R, Bainbridge J, *et al.* Evidence-based guideline: treatment of convulsive status epilepticus in children and adults: report of the Guideline Committee of the American Epilepsy Society. *Epilepsy currents* 2016; 16(1): 48-61.

Goodkin HP, Joshi S, Mtchedlishvili Z, Brar J, Kapur J. Subunit-specific trafficking of GABAA receptors during status epilepticus. *Journal of Neuroscience* 2008; 28(10): 2527-38.

Goodkin HP, Kapur J. The impact of diazepam's discovery on the treatment and understanding of status epilepticus. *Epilepsia* 2009; 50(9): 2011-8.

Goodkin HP, Yeh J-L, Kapur J. Status epilepticus increases the intracellular accumulation of GABAA receptors. *Journal of Neuroscience* 2005; 25(23): 5511-20.

Gutiérrez R, Heinemann U. Synaptic reorganization in explanted cultures of rat hippocampus. *Brain research* 1999; 815(2): 304-16.

Ilie A, Raimondo JV, Akerman CJ. Adenosine release during seizures attenuates GABAA receptor-mediated depolarization. *Journal of Neuroscience* 2012; 32(15): 5321-32.

Isomura Y, Sugimoto M, Fujiwara-Tsukamoto Y, Yamamoto-Muraki S, Yamada J, Fukuda A. Synaptically activated Cl<sup>-</sup>accumulation responsible for depolarizing GABAergic responses in mature hippocampal neurons. *Journal of Neurophysiology* 2003; 90(4): 2752-6.

Jiruska P, De Curtis M, Jefferys JG, Schevon CA, Schiff SJ, Schindler K. Synchronization and desynchronization in epilepsy: controversies and hypotheses. *The Journal of physiology* 2013; 591(4): 787-97.

Kaila K, Pasternack M, Saarikoski J, Voipio J. Influence of GABA-gated bicarbonate conductance on potential, current and intracellular chloride in crayfish muscle fibres. *The Journal of physiology* 1989; 416(1): 161-81.

Kamphuis W, Gorter J, Da Silva FL. A long-lasting decrease in the inhibitory effect of GABA on glutamate responses of hippocampal pyramidal neurons induced by kindling epileptogenesis. *Neuroscience* 1991; 41(2-3): 425-31.

Kapur J, Coulter DA. Experimental status epilepticus alters  $\gamma$ -aminobutyric acid type A receptor function in CA1 pyramidal neurons. *Annals of neurology* 1995; 38(6): 893-900.

Kelley MR, Deeb TZ, Brandon NJ, Dunlop J, Davies PA, Moss SJ. Compromising KCC2 transporter activity enhances the development of continuous seizure activity. *Neuropharmacology* 2016; 108: 103-10.

Khoshkhoo S, Vogt D, Sohal VS. Dynamic, cell-type-specific roles for GABAergic interneurons in a mouse model of optogenetically inducible seizures. *Neuron* 2017; 93(2): 291-8.

Krook-Magnuson E, Armstrong C, Oijala M, Soltesz I. On-demand optogenetic control of spontaneous seizures in temporal lobe epilepsy. *Nature communications* 2013; 4: 1376.

Krook-Magnuson E, Soltesz I. Beyond the hammer and the scalpel: selective circuit control for the epilepsies. *Nature neuroscience* 2015; 18(3): 331.

Kyrozis A, Reichling DB. Perforated-patch recording with gramicidin avoids artifactual changes in intracellular chloride concentration. *Journal of neuroscience methods* 1995; 57(1): 27-35.

Lamsa K, Kaila K. Ionic mechanisms of spontaneous GABAergic events in rat hippocampal slices exposed to 4-aminopyridine. *Journal of neurophysiology* 1997; 78(5): 2582-91.

Lillis KP, Kramer MA, Mertz J, Staley KJ, White JA. Pyramidal cells accumulate chloride at seizure onset. *Neurobiology of disease* 2012; 47(3): 358-66.

Magloire V, Cornford JH, Lieb A, Kullmann DM, Pavlov I. KCC2 overexpression prevents the paradoxical seizure-promoting action of somatic inhibition. *bioRxiv* 2018: 279539.

Mayer SA, Claassen J, Lokin J, Mendelsohn F, Dennis LJ, Fitzsimmons B-F. Refractory status epilepticus: frequency, risk factors, and impact on outcome. *Archives of neurology* 2002; 59(2): 205-10.

Mody I, Lambert J, Heinemann U. Low extracellular magnesium induces epileptiform activity and spreading depression in rat hippocampal slices. *Journal of neurophysiology* 1987; 57(3): 869-88.

Moore YE, Kelley MR, Brandon NJ, Deeb TZ, Moss SJ. Seizing control of KCC2: a new therapeutic target for epilepsy. *Trends in neurosciences* 2017; 40(9): 555-71.

Morimoto K, Fahnstock M, Racine RJ. Kindling and status epilepticus models of epilepsy: rewiring the brain. *Progress in neurobiology* 2004; 73(1): 1-60.

Naylor DE. Treating acute seizures with benzodiazepines: does seizure duration matter? *Epileptic Disorders* 2014; 16(1): 69-83.

Naylor DE, Liu H, Wasterlain CG. Trafficking of GABAA receptors, loss of inhibition, and a mechanism for pharmacoresistance in status epilepticus. *Journal of Neuroscience* 2005; 25(34): 7724-33.

Raimondo JV, Joyce B, Kay L, Schlagheck T, Newey SE, Srinivas S, *et al.* A genetically-encoded chloride and pH sensor for dissociating ion dynamics in the nervous system. *Frontiers in cellular neuroscience* 2013; 7: 202.

Raimondo JV, Tomes H, Irkle A, Kay L, Kellaway L, Markram H, *et al.* Tight coupling of astrocyte pH dynamics to epileptiform activity revealed by genetically encoded pH sensors. *Journal of Neuroscience* 2016; 36(26): 7002-13.

Rivera C, Voipio J, Thomas-Crusells J, Li H, Emri Z, Sipilä S, *et al.* Mechanism of activity-dependent downregulation of the neuron-specific K-Cl cotransporter KCC2. *Journal of Neuroscience* 2004; 24(19): 4683-91.

Royo NC, Vandenberghe LH, Ma J-Y, Hauspurg A, Yu L, Maronski M, *et al.* Specific AAV serotypes stably transduce primary hippocampal and cortical cultures with high efficiency and low toxicity. *Brain research* 2008; 1190: 15-22.

Sato SS, Artoni P, Landi S, Cozzolino O, Parra R, Pracucci E, *et al.* Simultaneous two-photon imaging of intracellular chloride concentration and pH in mouse pyramidal neurons in vivo. *Proceedings of the National Academy of Sciences* 2017; 114(41): E8770-E9.

Silayeva L, Deeb TZ, Hines RM, Kelley MR, Munoz MB, Lee HH, *et al.* KCC2 activity is critical in limiting the onset and severity of status epilepticus. *Proceedings of the National Academy of Sciences* 2015: 201415126.

Staley KJ, Soldo BL, Proctor WR. Ionic mechanisms of neuronal excitation by inhibitory GABAA receptors. *Science* 1995; 269(5226): 977-81.

Stoppini L, Buchs P-A, Muller D. A simple method for organotypic cultures of nervous tissue. *Journal of neuroscience methods* 1991; 37(2): 173-82.

Swartzwelder HS, Lewis D, Anderson W, Wilson W. Seizure-like events in brain slices: suppression by interictal activity. *Brain research* 1987; 410(2): 362-6.

Taniguchi H, He M, Wu P, Kim S, Paik R, Sugino K, *et al.* A resource of Cre driver lines for genetic targeting of GABAergic neurons in cerebral cortex. *Neuron* 2011; 71(6): 995-1013.

Tolner EA, Hochman DW, Hassinen P, Otáhal J, Gaily E, Haglund MM, *et al.* Five percent CO<sub>2</sub> is a potent, fast-acting inhalation anticonvulsant. *Epilepsia* 2011; 52(1): 104-14.

Trevelyan AJ, Schevon CA. How inhibition influences seizure propagation. *Neuropharmacology* 2013; 69: 45-54.

Trevelyan AJ, Sussillo D, Watson BO, Yuste R. Modular propagation of epileptiform activity: evidence for an inhibitory veto in neocortex. *Journal of Neuroscience* 2006; 26(48): 12447-55.

Trevelyan AJ, Sussillo D, Yuste R. Feedforward inhibition contributes to the control of epileptiform propagation speed. *Journal of Neuroscience* 2007; 27(13): 3383-7.

Trinka E, Cock H, Hesdorffer D, Rossetti AO, Scheffer IE, Shinnar S, *et al.* A definition and classification of status epilepticus—Report of the ILAE Task Force on Classification of Status Epilepticus. *Epilepsia* 2015; 56(10): 1515-23.

Wright R, Newey SE, Ilie A, Wefelmeyer W, Raimondo JV, Gingham R, *et al.* Neuronal chloride regulation via KCC2 is modulated through a GABAB receptor protein complex. *Journal of Neuroscience* 2017: 2164-16.

Wright R, Raimondo J, Akerman C. Spatial and temporal dynamics in the ionic driving force for GABAA receptors. *Neural plasticity* 2011; 2011.

Zhang CL, Dreier JP, Heinemann U. Paroxysmal epileptiform discharges in temporal lobe slices after prolonged exposure to low magnesium are resistant to clinically used anticonvulsants. *Epilepsy research* 1995; 20(2): 105-11.

Zhang T, Todorovic MS, Williamson J, Kapur J. Flupirtine and diazepam combination terminates established status epilepticus: results in three rodent models. *Annals of clinical and translational neurology* 2017; 4(12): 888-96.

Zhang ZJ, Koifman J, Shin DS, Ye H, Florez CM, Zhang L, *et al.* Transition to seizure: ictal discharge is preceded by exhausted presynaptic GABA release in the hippocampal CA3 region. *Journal of Neuroscience* 2012; 32(7): 2499-512.

Ziburkus J, Cressman JR, Barreto E, Schiff SJ. Interneuron and pyramidal cell interplay during in vitro seizure-like events. *Journal of neurophysiology* 2006; 95(6): 3948-54.



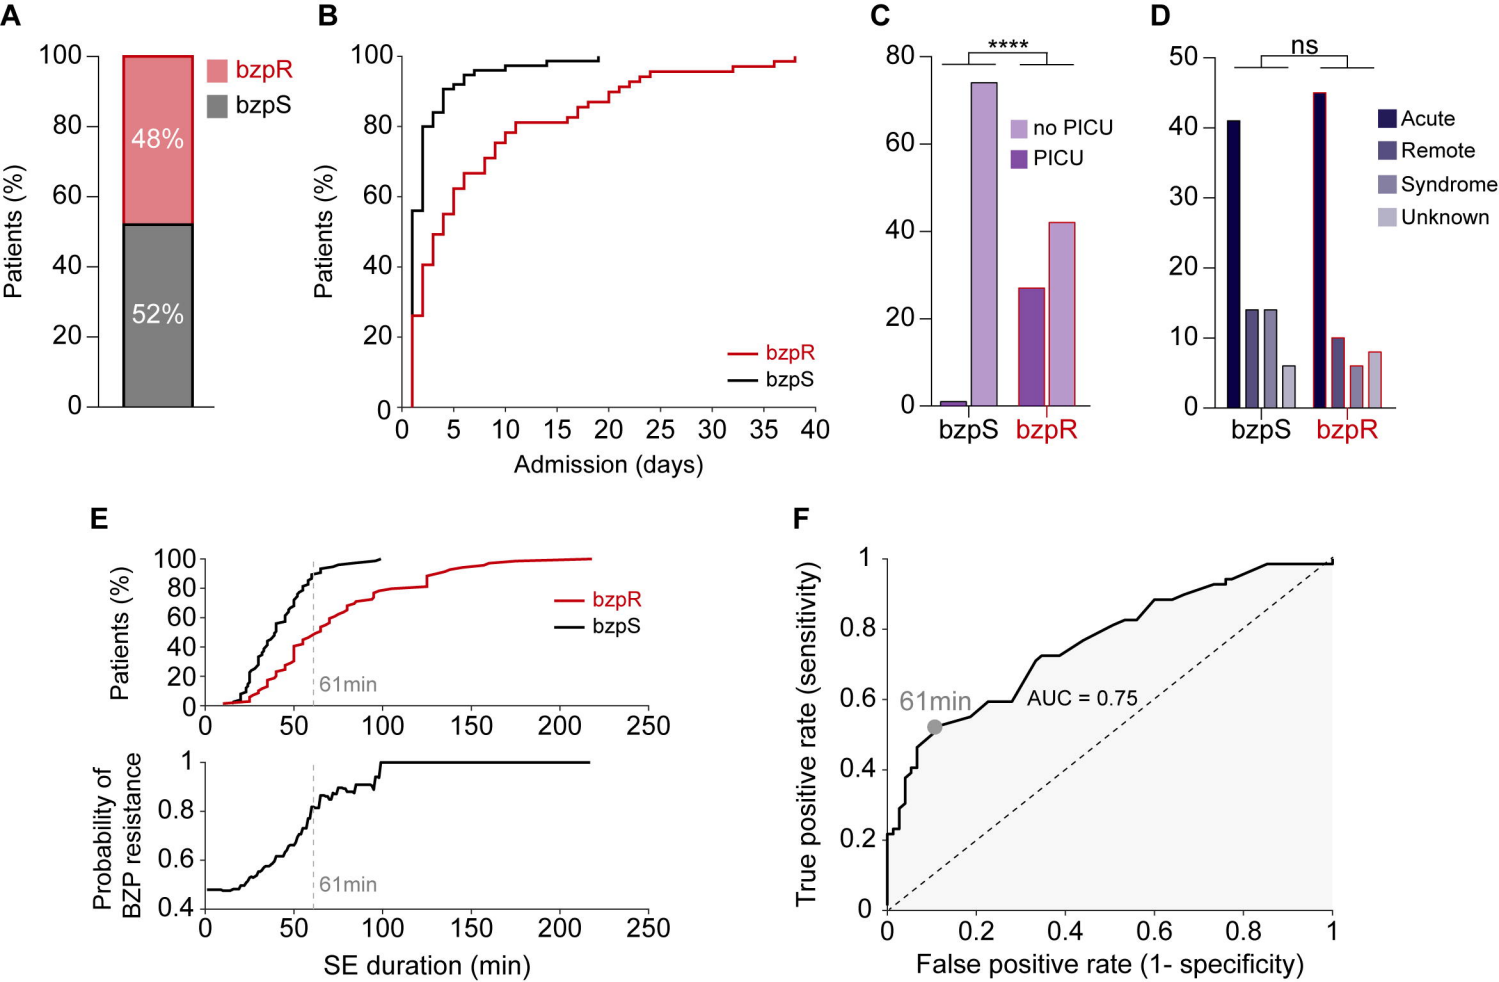

**Figure 1: Resistance to first-line benzodiazepine treatment increases with the duration of status epilepticus and is associated with increased morbidity**

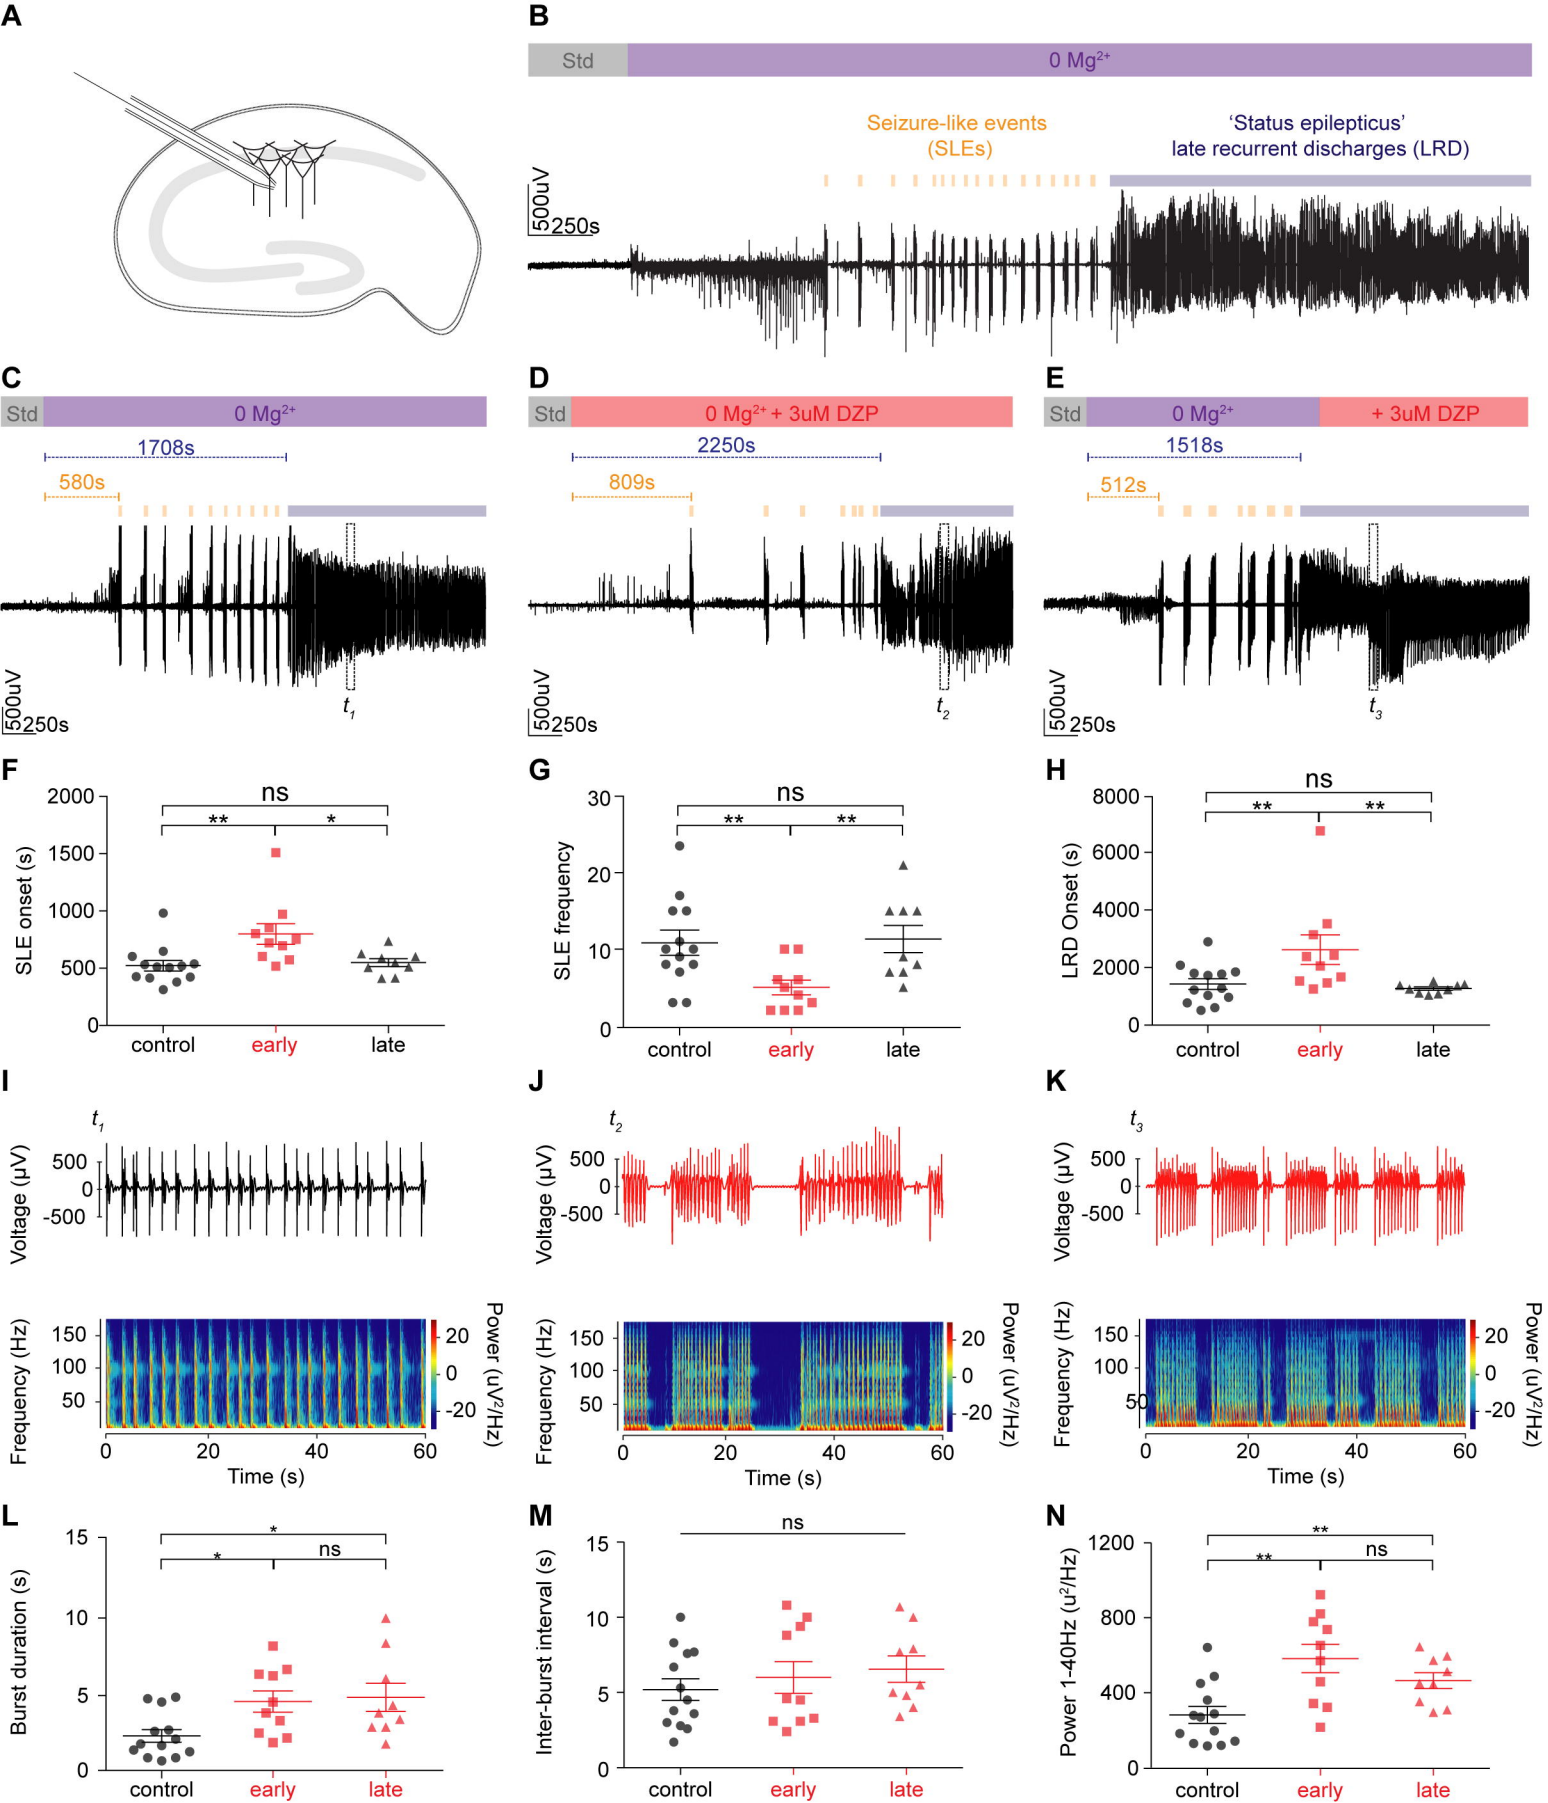

**Figure 2: Early application of diazepam has an anticonvulsant effect while late application positively modulates epileptiform discharges in an *in vitro* model of status epilepticus**

**A**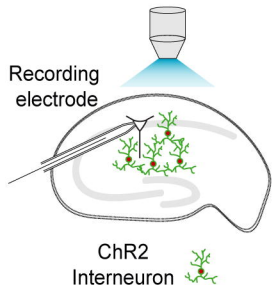**B**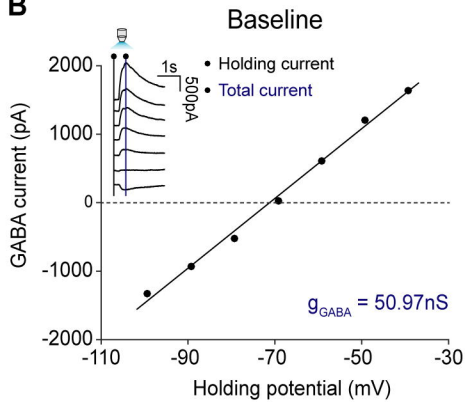**C**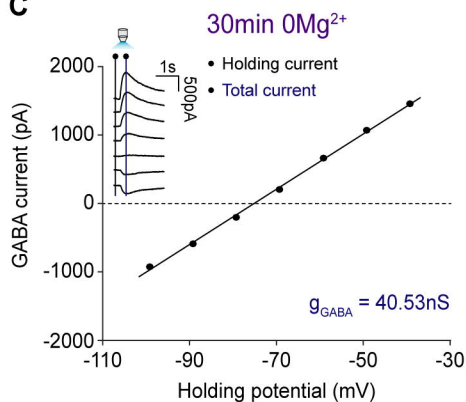**D**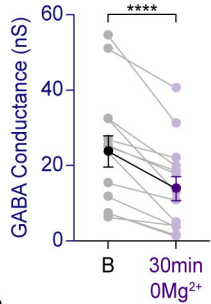

**Figure 3: Persistent seizure activity reduces GABA synaptic conductances**

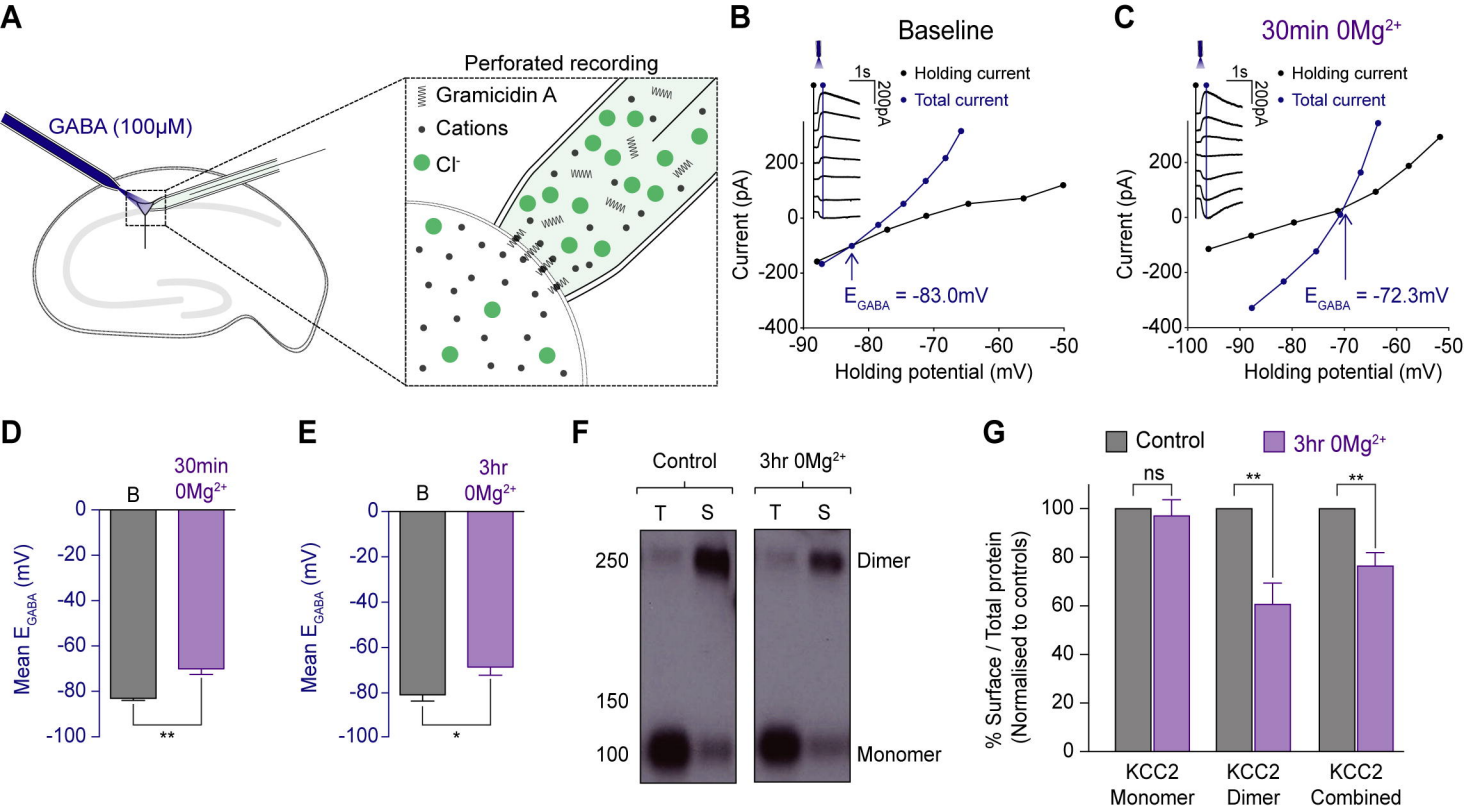

**Figure 4: Persistent seizure activity is associated with compromised neuronal Cl<sup>-</sup> extrusion**

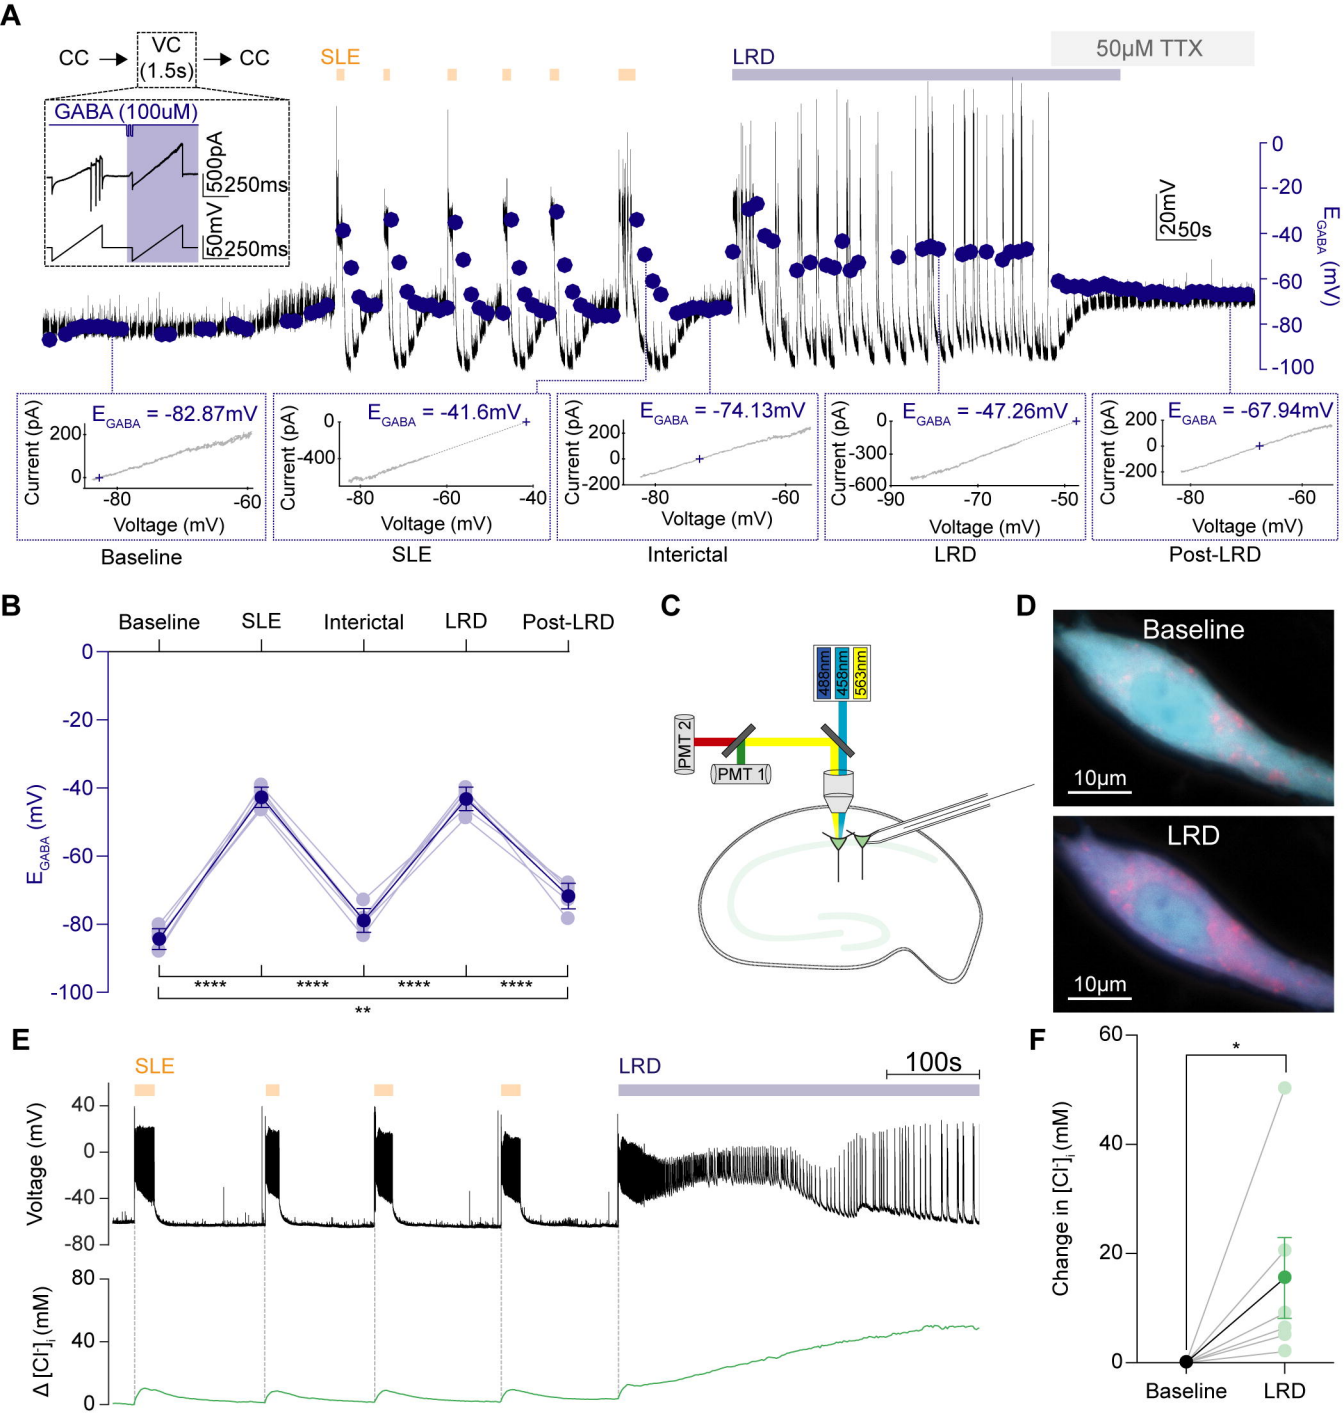

**Figure 5: Persistent seizure activity drives pronounced depolarizing shifts in  $E_{GABA}$  and intracellular  $Cl^-$  accumulation**

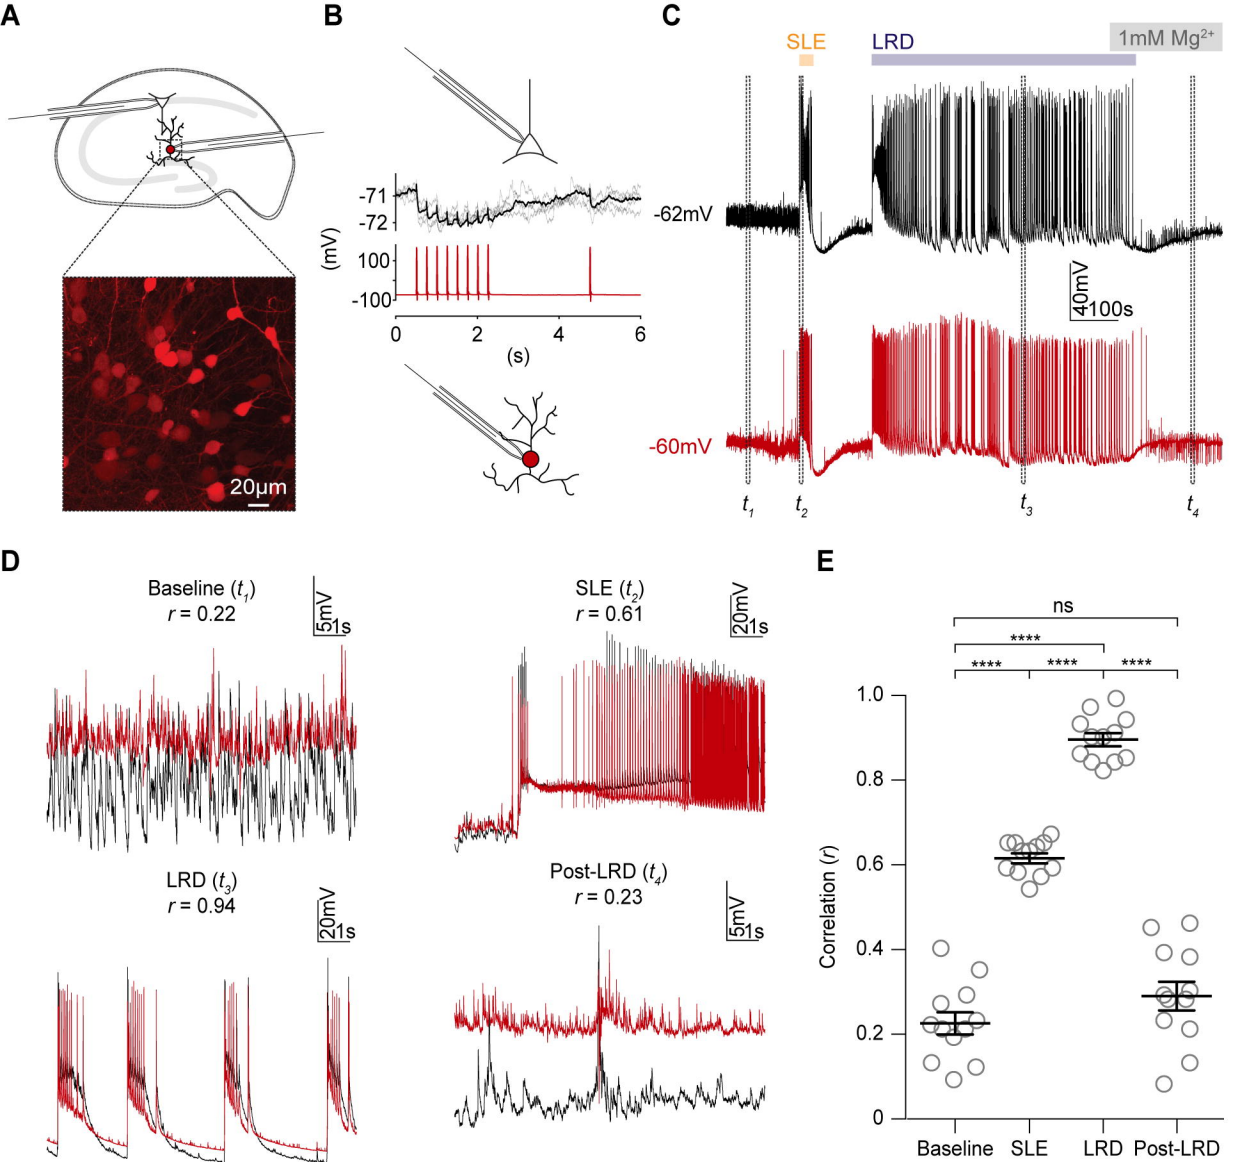

**Figure 6: GABA-releasing interneurons are active and highly correlated with pyramidal cell activity during the late recurrent discharge phase**



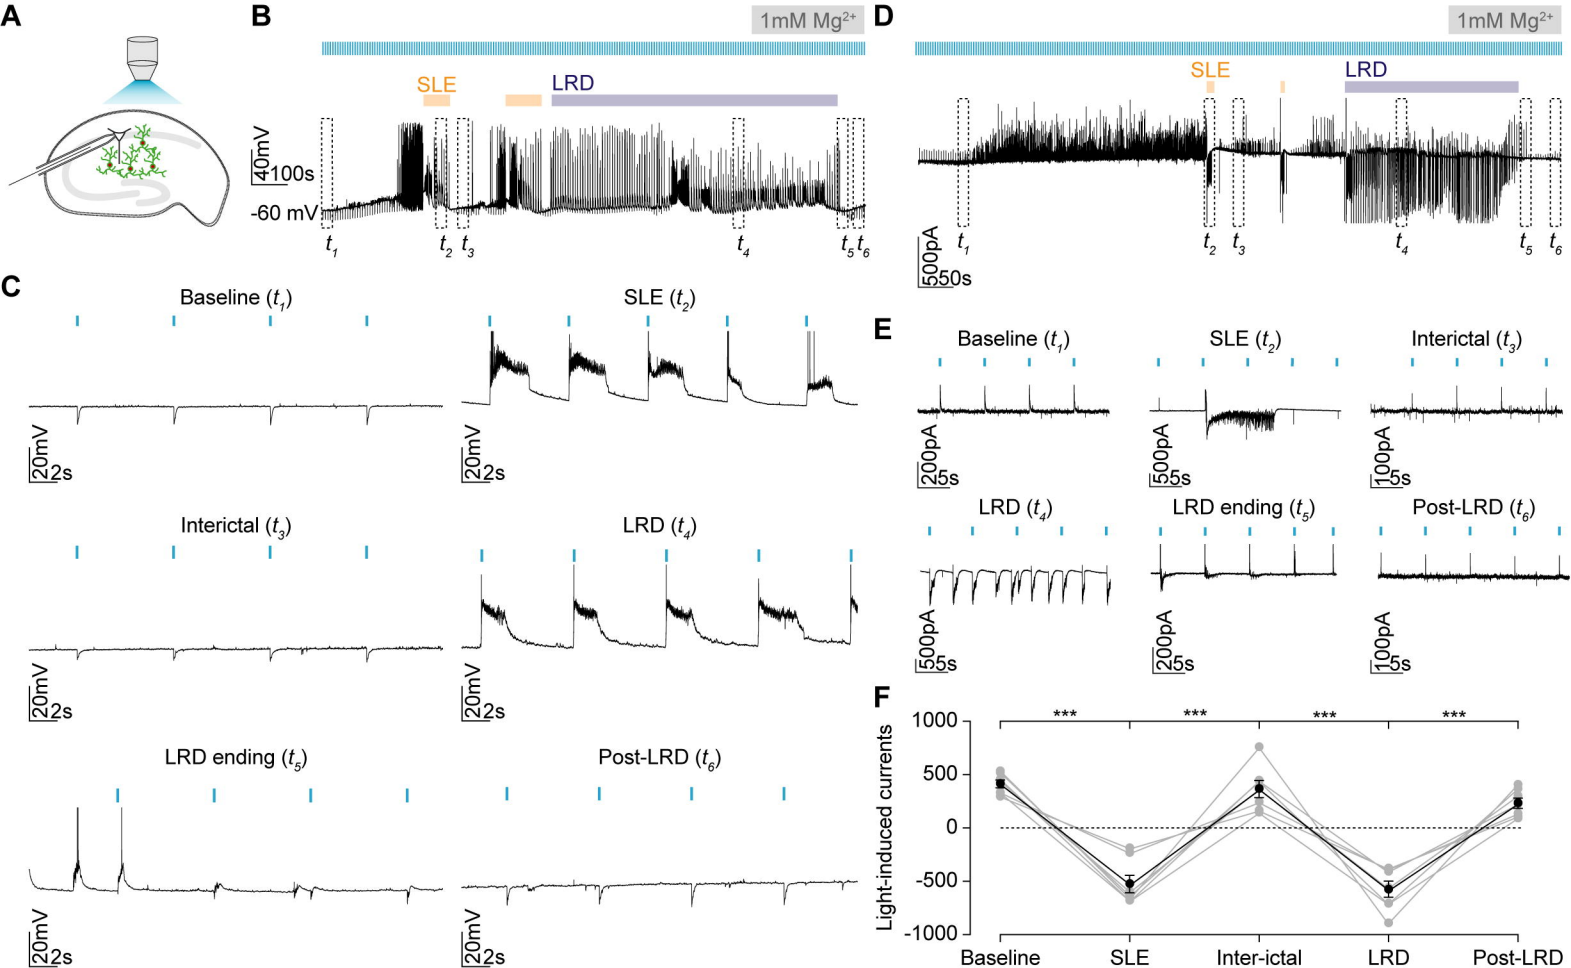

**Figure 7: GABAergic signaling is strongly depolarising during the late recurrent discharge phase**

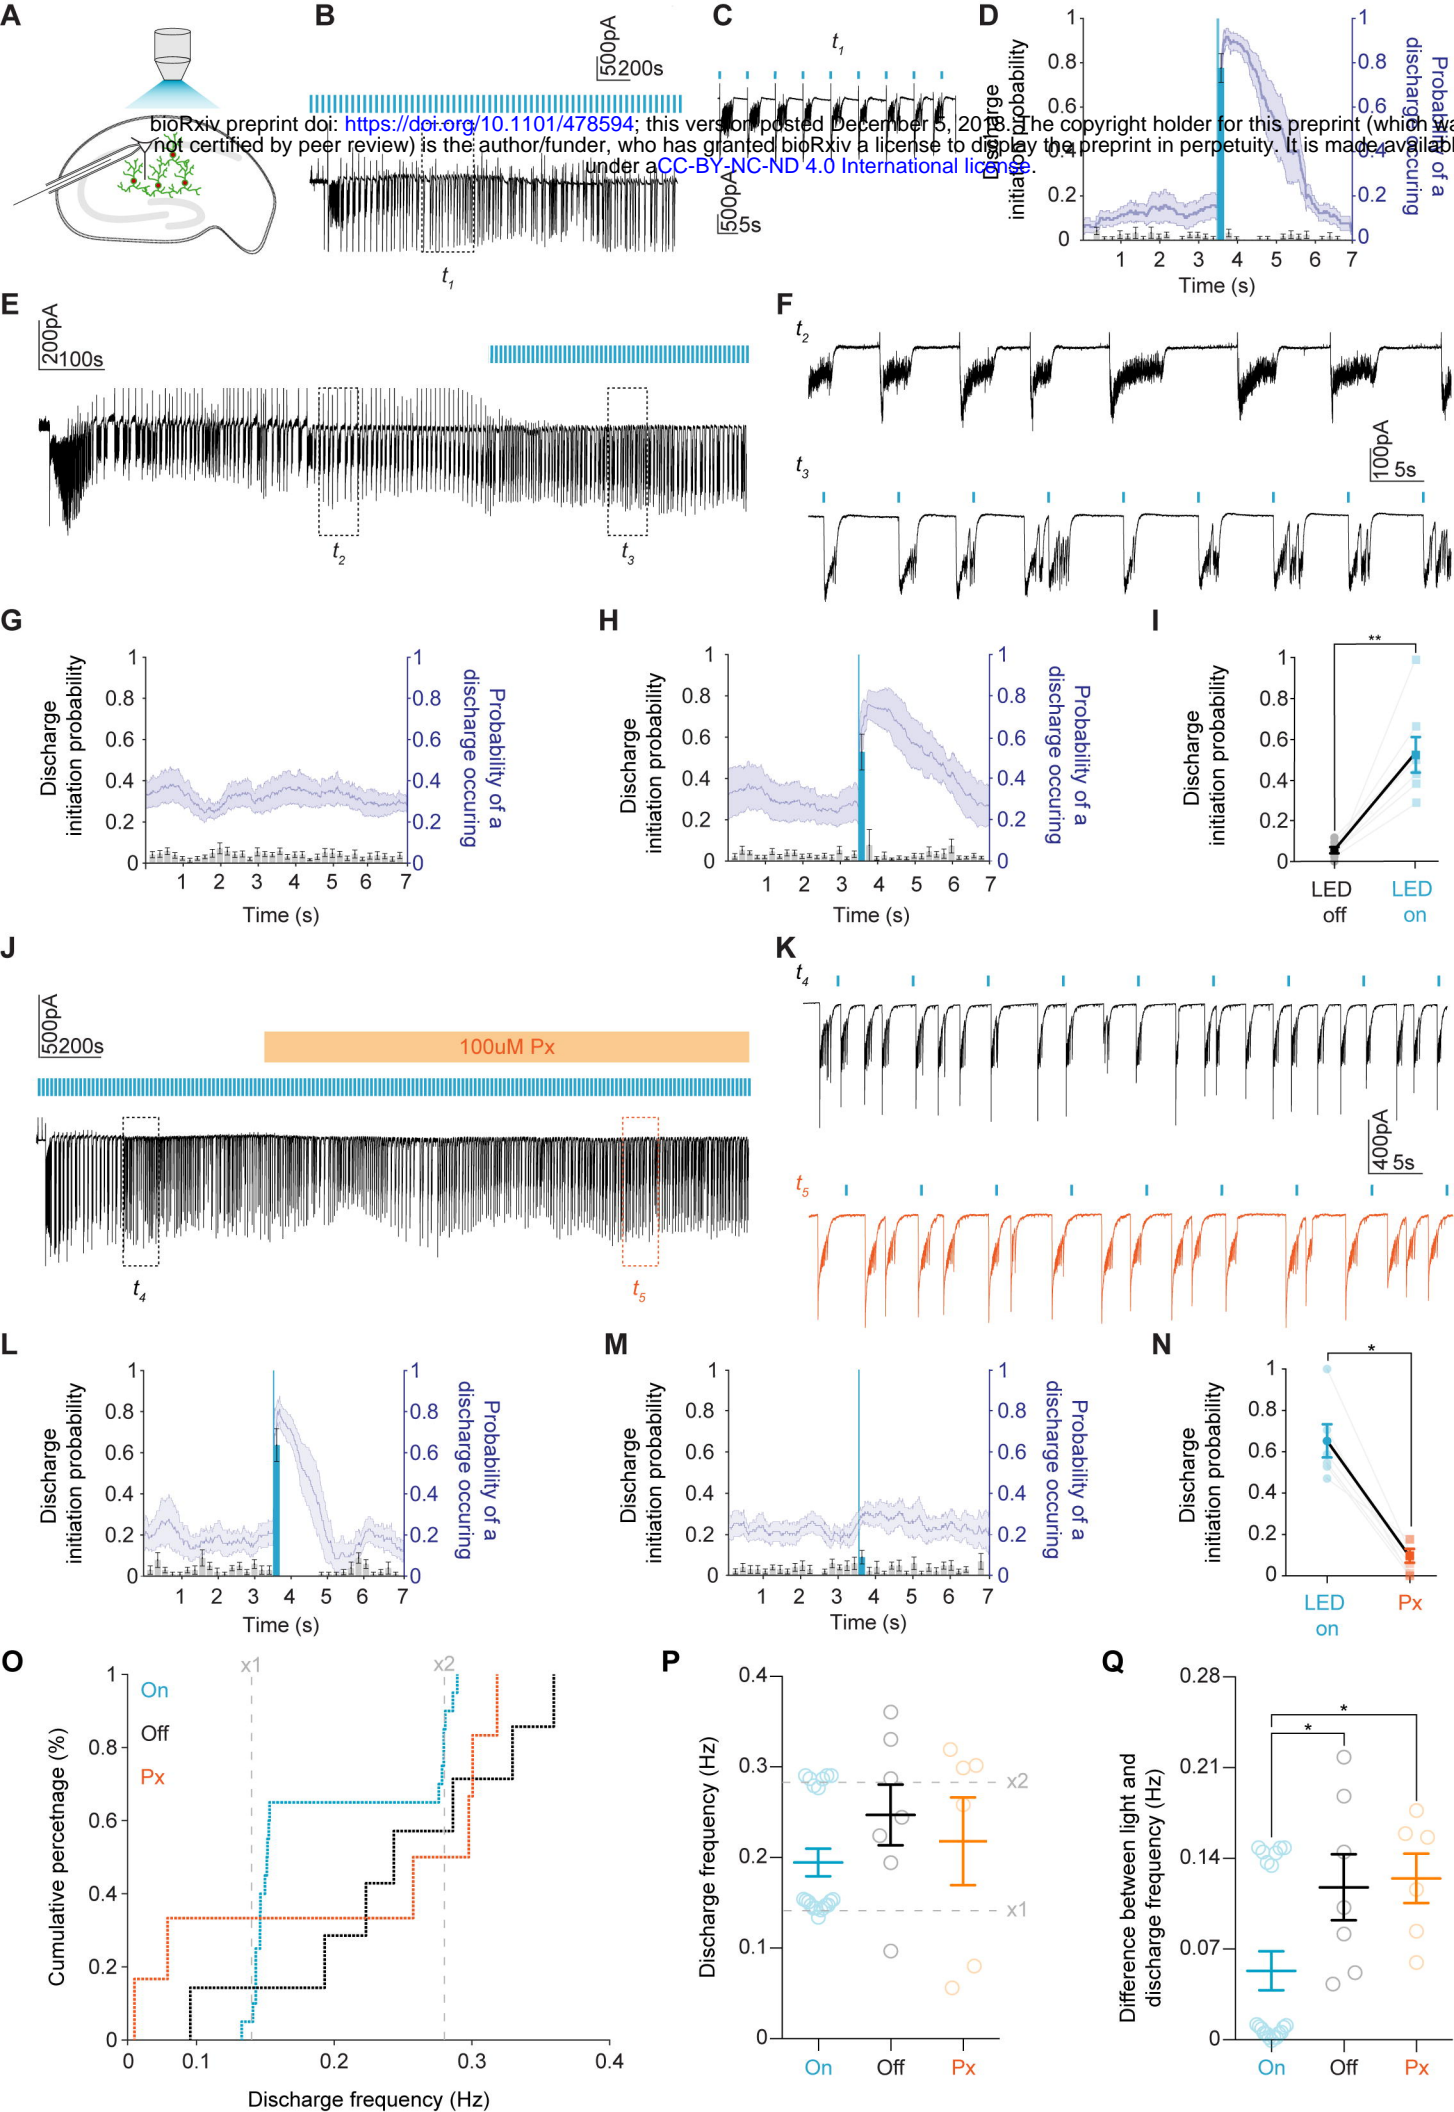

**Figure 8: Optogenetic activation of GABAergic interneurons during LRD triggers burst discharges and entrains the hippocampal network in a GABA<sub>A</sub> receptor dependent manner.**



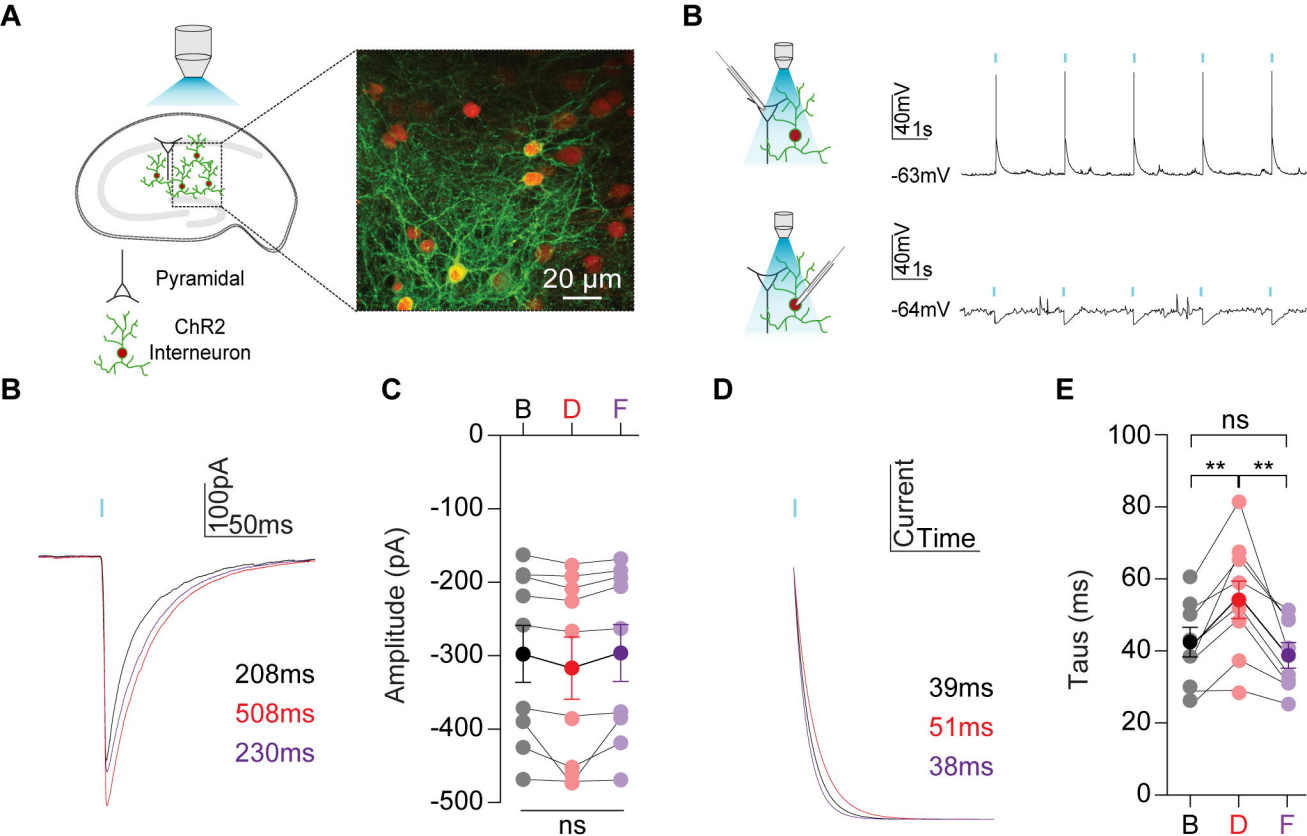

**Supplementary figure 1: Diazepam enhances GABA<sub>A</sub>R-mediated currents in mouse hippocampal organotypic brain slice cultures**

**Supplementary Table 1**

| Benzodiazepine response | <i>up to 1 hour</i> | <i>&gt;1 hour</i> | <i>Total</i> |
|-------------------------|---------------------|-------------------|--------------|
| <i>Sensitive</i>        | 67                  | 8                 | 75           |
| <i>Resistant</i>        | 33                  | 36                | 69           |
| <i>Total</i>            | 100                 | 44                | 144          |
